# Supplementary material for: Structural and spatial chromatin features at developmental gene loci in human pluripotent stem cells
Source: PubMed Central journal article supplement (PMC5696376; doi:10.1038/s41467-017-01679-x), 2017-11-20
Supplement: 41467_2017_1679_MOESM1_ESM.pdf [file 41467_2017_1679_MOESM1_ESM.pdf]

# HF

% Occupancy of chromatin states  
at promoter regions ( $\pm 250$  bp from TSS)  
0  100 [%]

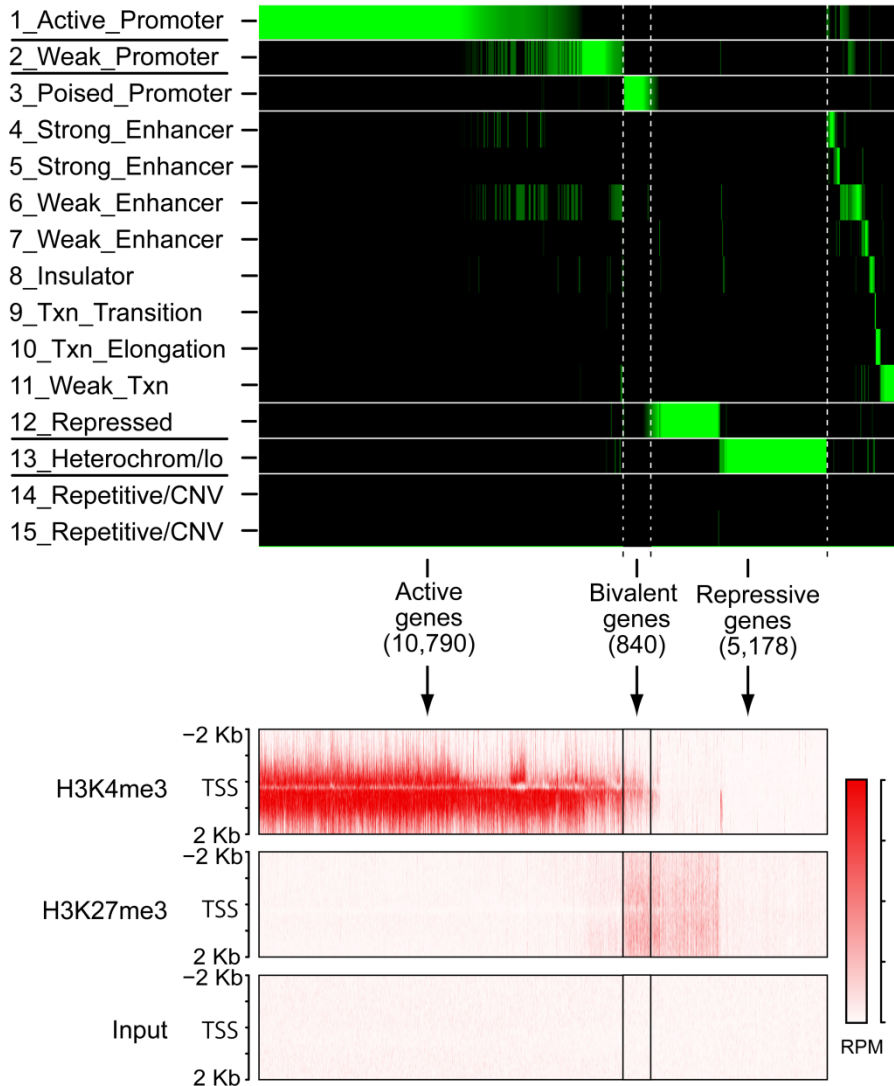

## Supplementary Figure 1. Definition of transcriptional states of genes in HFs

Definition of transcriptional states of genes (bivalent, active, repressive and other gene groups). Top heatmap represents the occupancy of each chromatin state (%) within TSS  $\pm 250$  bp for all refseq genes in HFs (NHLFs). Bottom heatmaps indicate H3K4me3 and H3K27me3 modification profiles (RPM values) around TSS for active, repressive and bivalent genes defined by chromatin states in HFs (NHLFs). Histone modification profiles are shown within TSS  $\pm 2$  Kb.

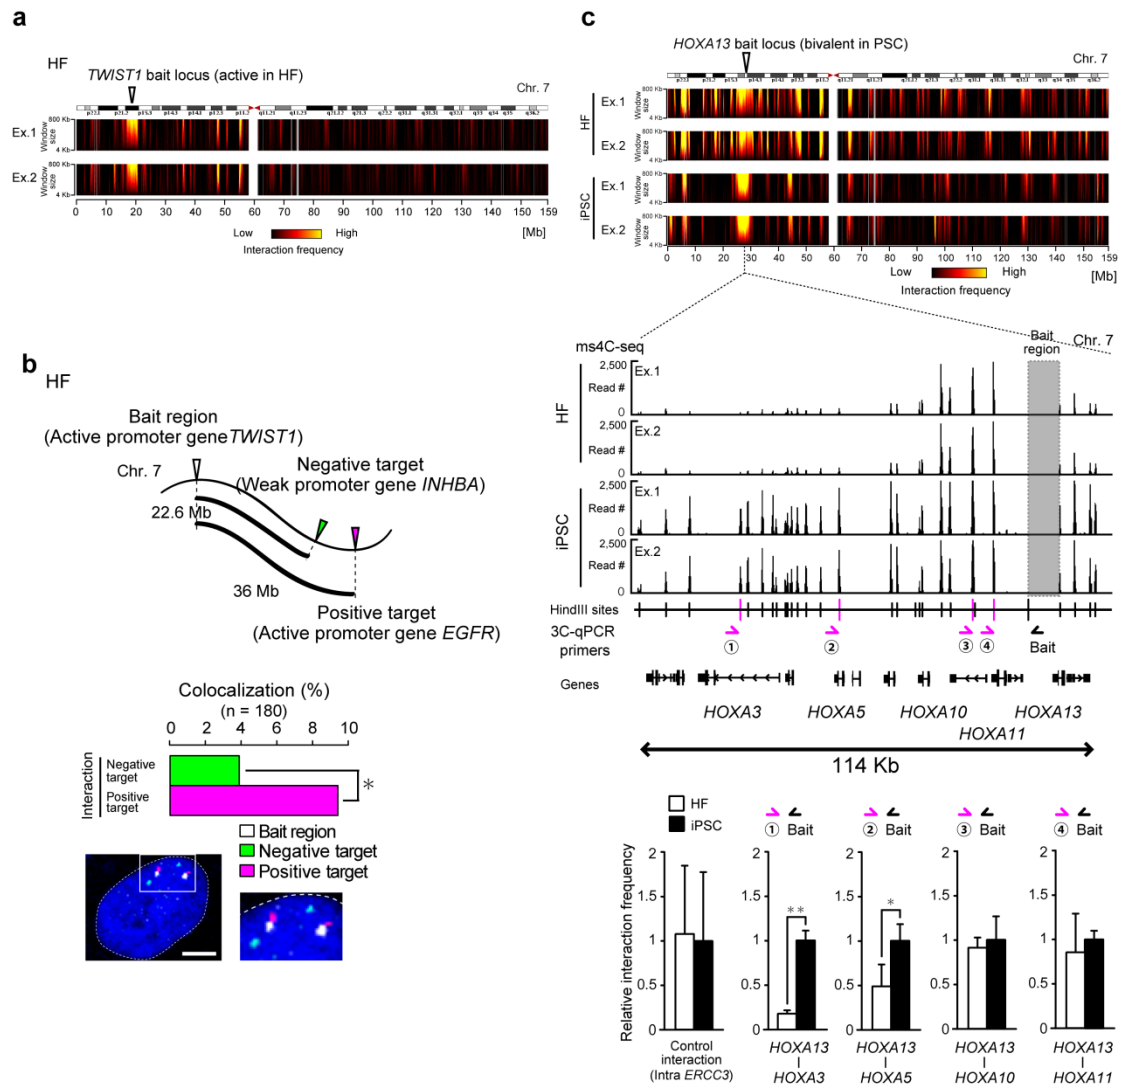

### Supplementary Figure 2. Analysis of ms3-seq data

(a) Profile of the cis-chromosomal interaction in the *TWIST1* gene locus in HF (HDFs). Chromatin interaction frequencies in the *TWIST1* gene locus are shown as described in Fig. 1c.

(b) Analysis of chromatin interactions with 3D DNA FISH in HF (HDFs). Colocalization percentage of cis-interaction target loci in *TWIST1*. The left panel illustrates the relative positions of the positive (*EGFR*) and negative (*INHBA*) interaction target loci for the bait (*TWIST1*) locus on the genome. The bar graph shows the colocalization percentage between the bait (*TWIST1*) locus and the positive (magenta) or negative (green) interaction loci (n = 180, Fisher's exact one-sided test, \*p < 0.03). Nuclei were stained with Hoechst (blue). Bait locus (*TWIST1*), interaction positive locus (*EGFR*) and interaction negative locus (*INHBA*) are indicated as white,

magenta and green. Scale bar, 5  $\mu$ m.

(c) Validation of the ms3C-seq data by 3C-qPCR. Top: Cis interaction frequencies of the *HOXA13* gene locus are presented with domainograms. The color scale is the same as shown in Fig. 1b. Middle: The bar plots show ms3C-seq read distributions in each HindIII site around the *HOXA* cluster locus in iPSCs and their original cells HFs (HDFs). The locations of primers that were used for 3C-qPCR are represented by interaction target loci (magenta arrows) and bait (black arrow). Bottom: Relative interaction frequencies between *HOXA13* and each *HOXA* locus were determined by 3C-qPCR in HFs (HDFs) and iPSCs (n = 3). Interaction frequency of the *ERCC3* region is a positive control. (Means  $\pm$  SD, t-test, \*p < 0.05, \*\*p < 0.001).

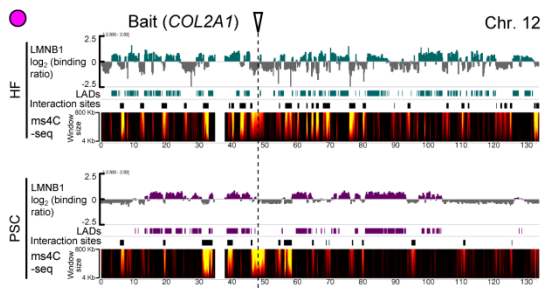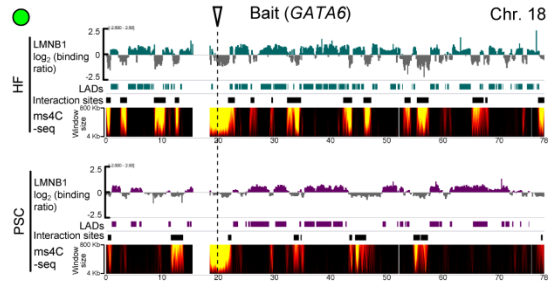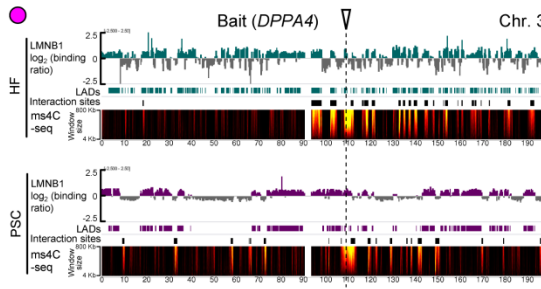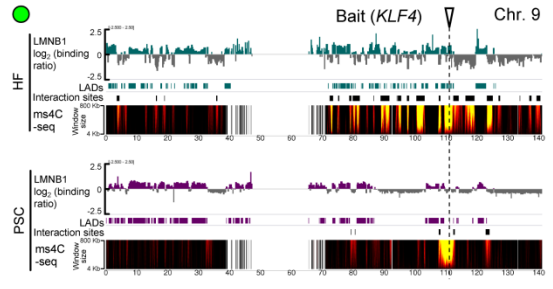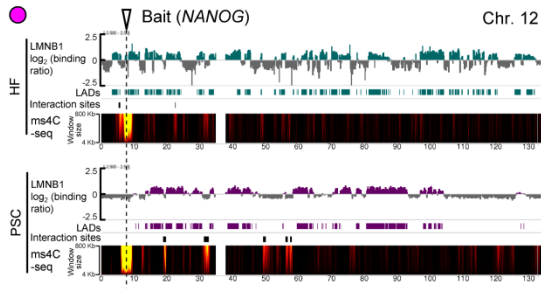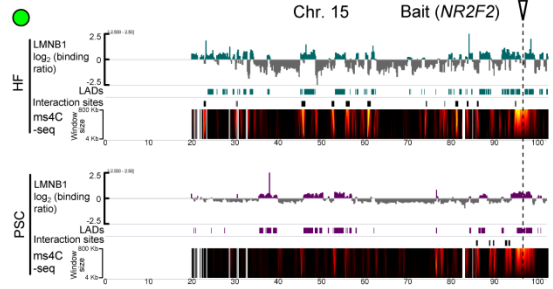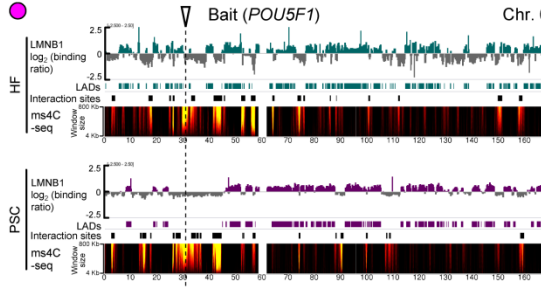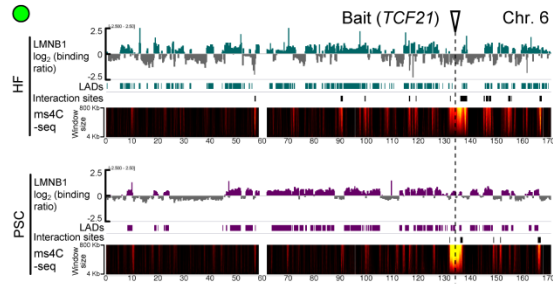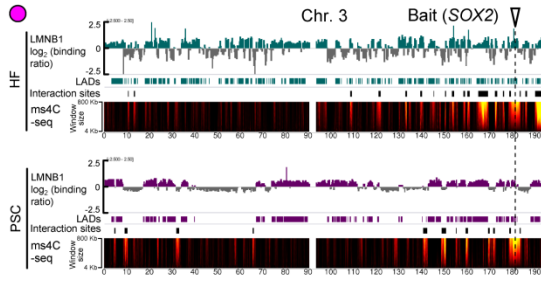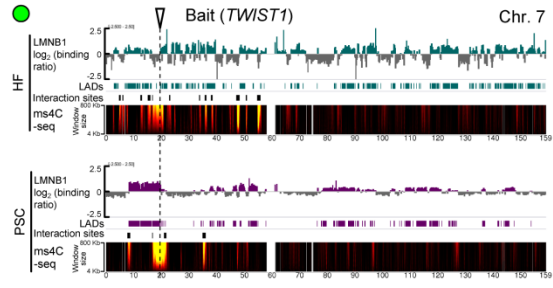

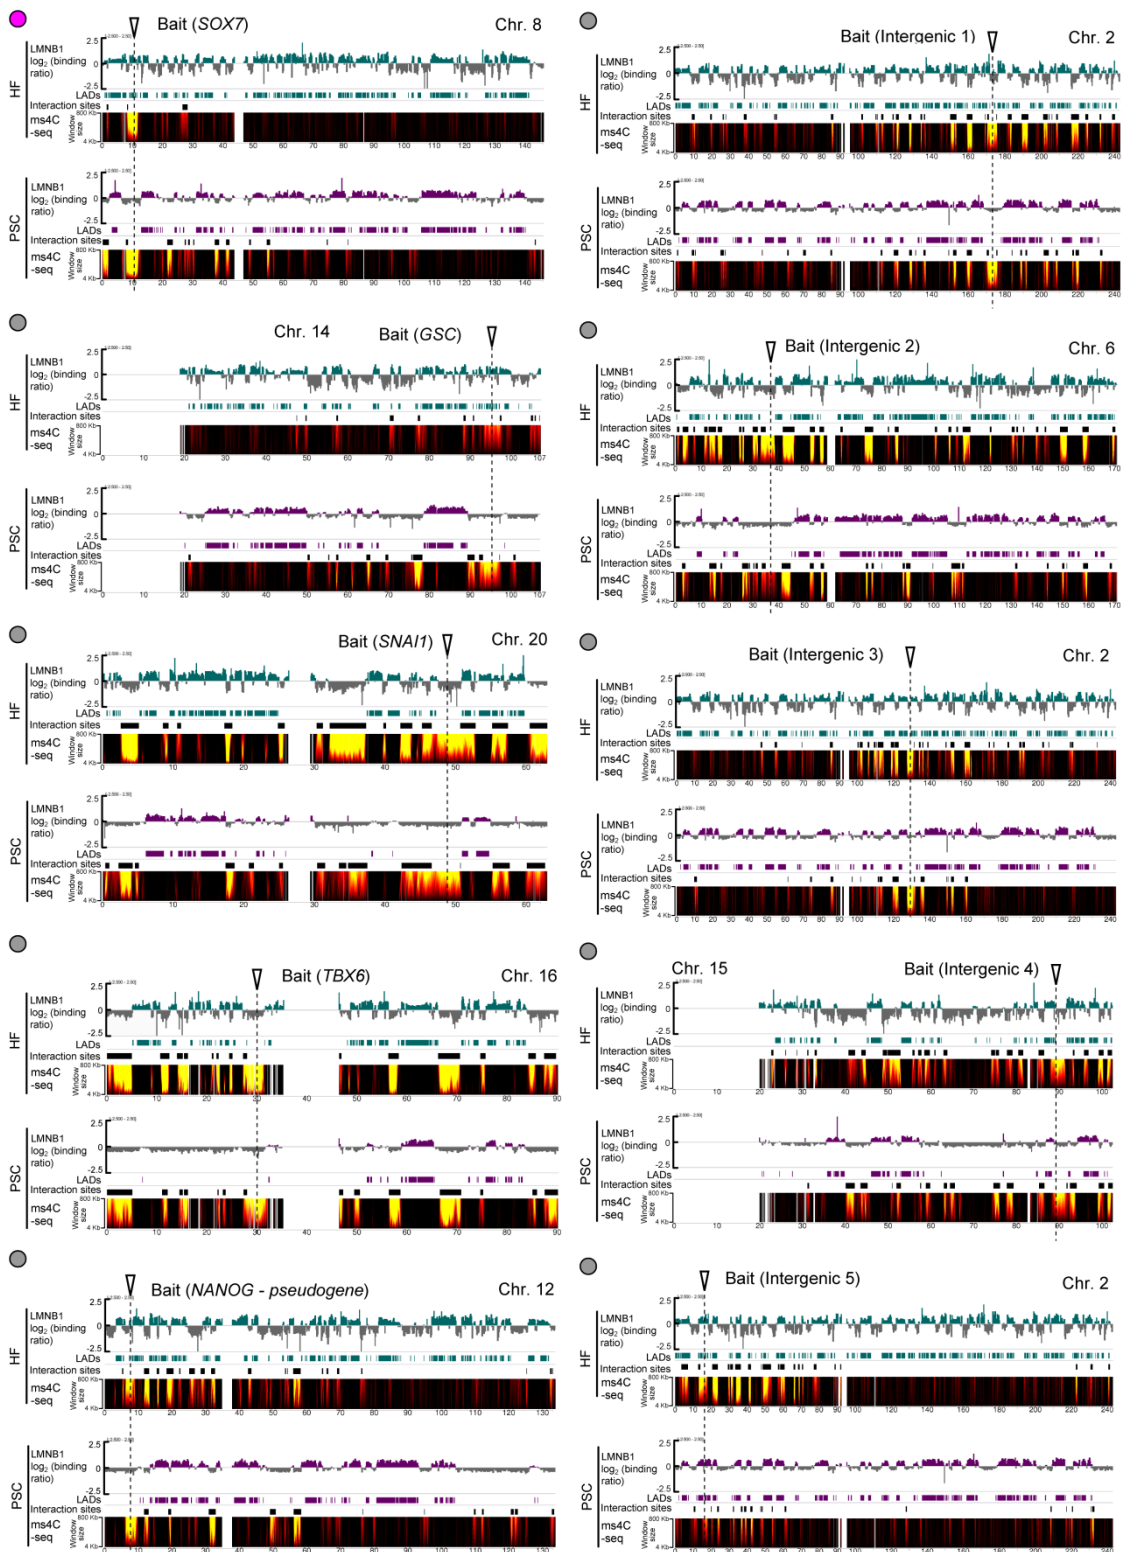

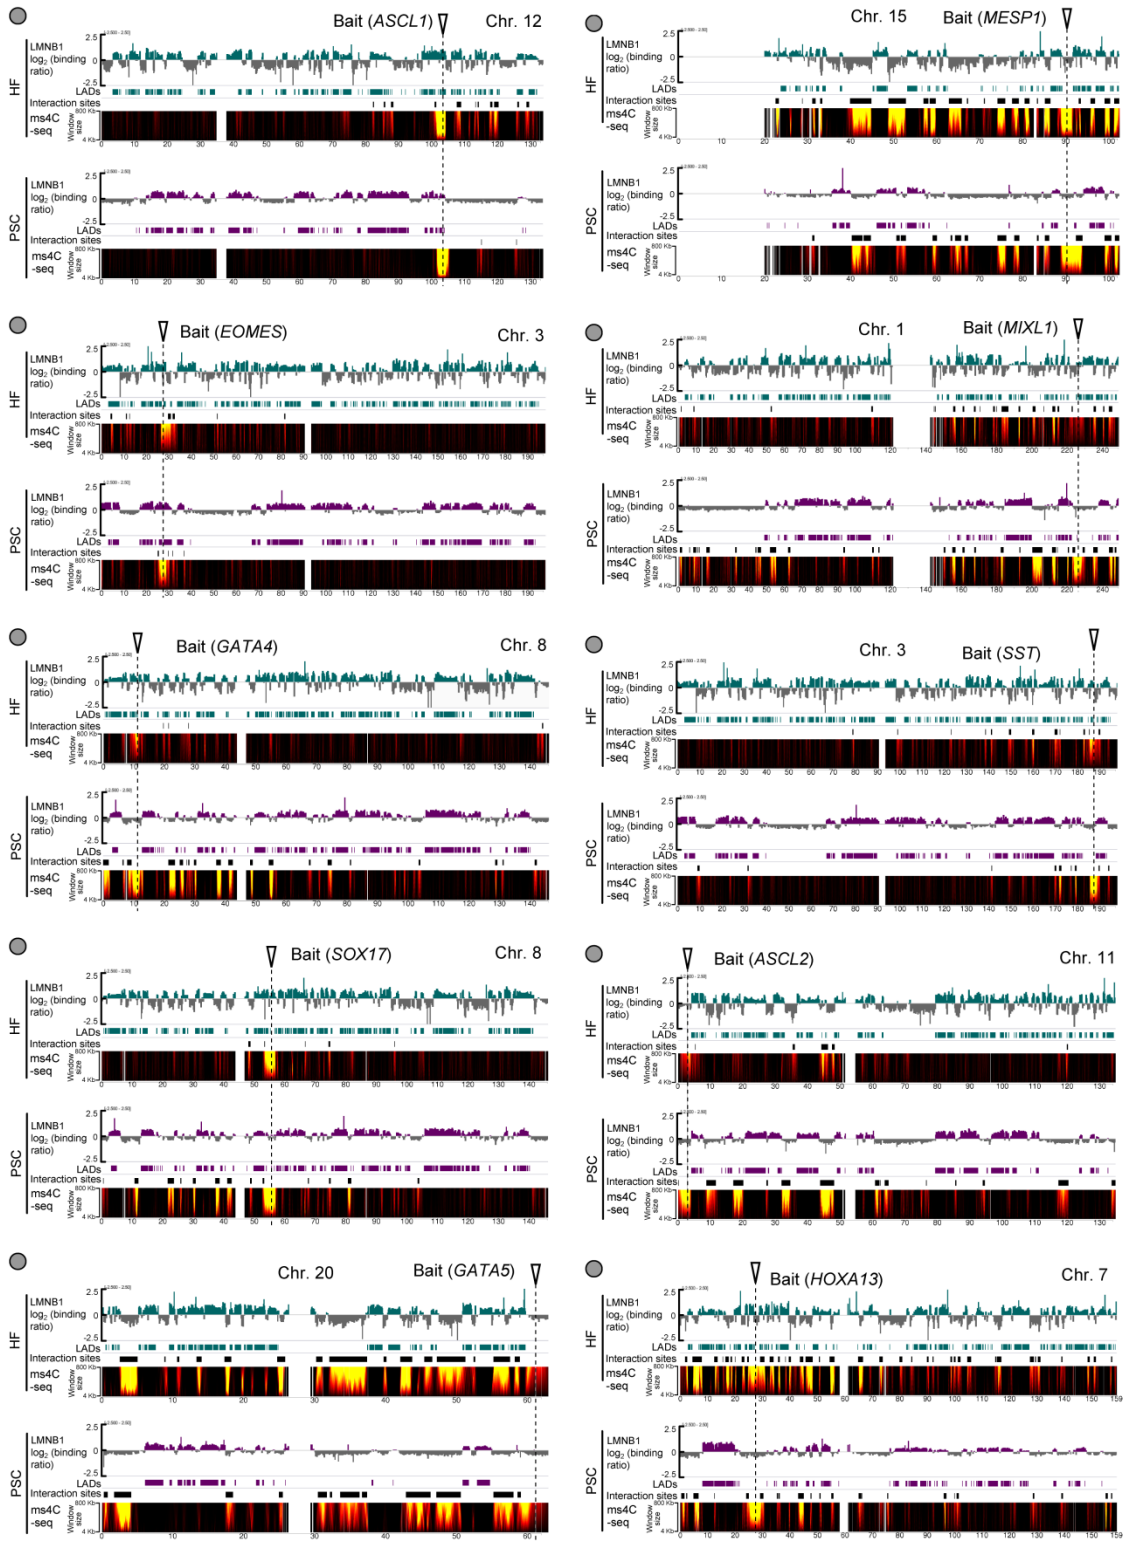



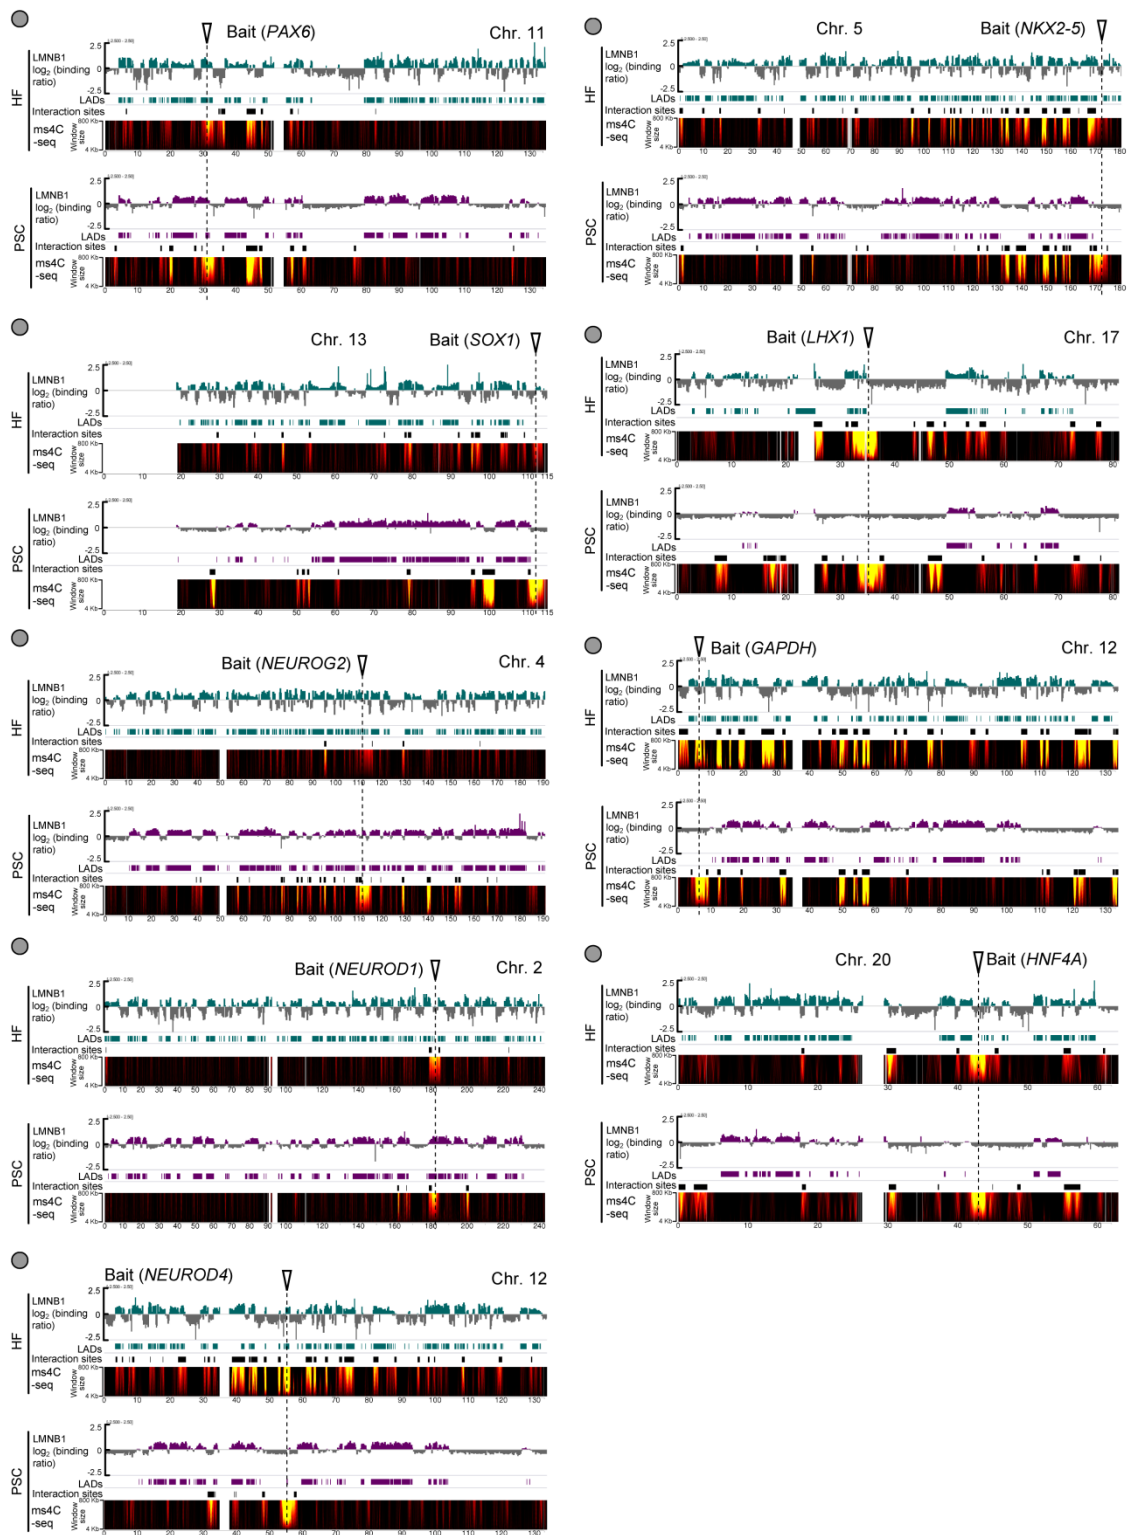

**Supplementary Figure 3. LADs and chromatin interaction profiles in HF's and hPSCs**

Relationship between chromatin interaction profiles and lamina association profiles at bivalent gene loci. The profiles are shown as described in Fig. 4d.

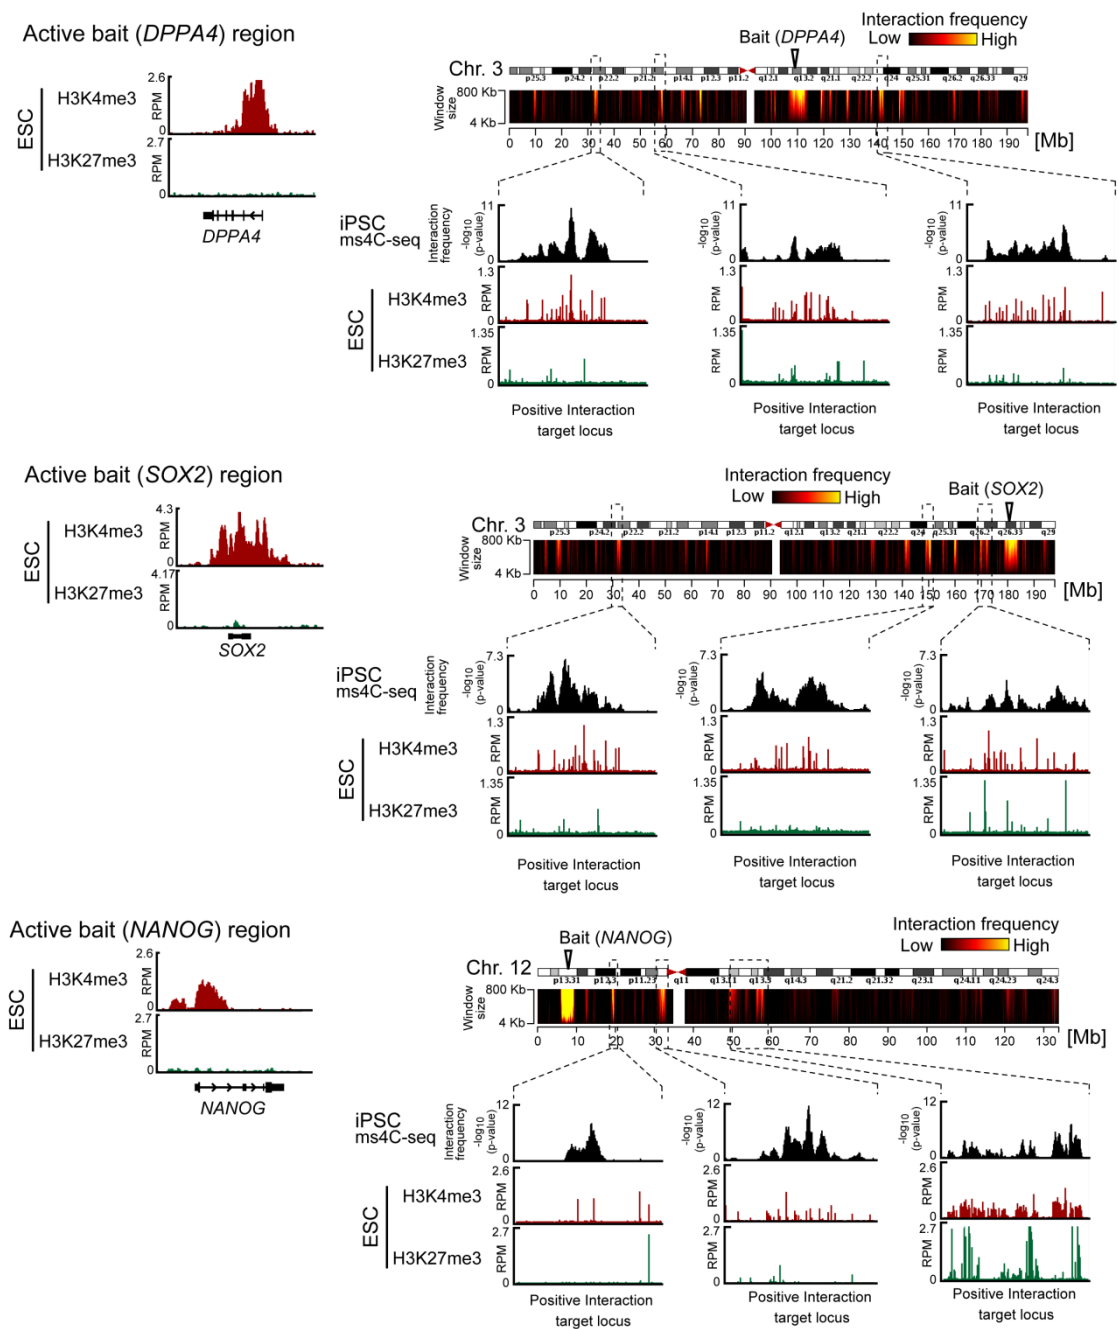

**Supplementary Figure 4. Epigenetic states of the interaction target sites of the active gene locus**

Histone modification patterns of H3K4me3 and H3K27me3 in the active gene loci (*NANOG*, *DPPA4* and *SOX2*) and their positive interaction target sites in hiPSCs. ChIP-seq data are represented by RPM signals for H3K4me3 (red) and H3K27me3 (green) in ESCs below ms3C-seq interaction signals in iPSCs (black).



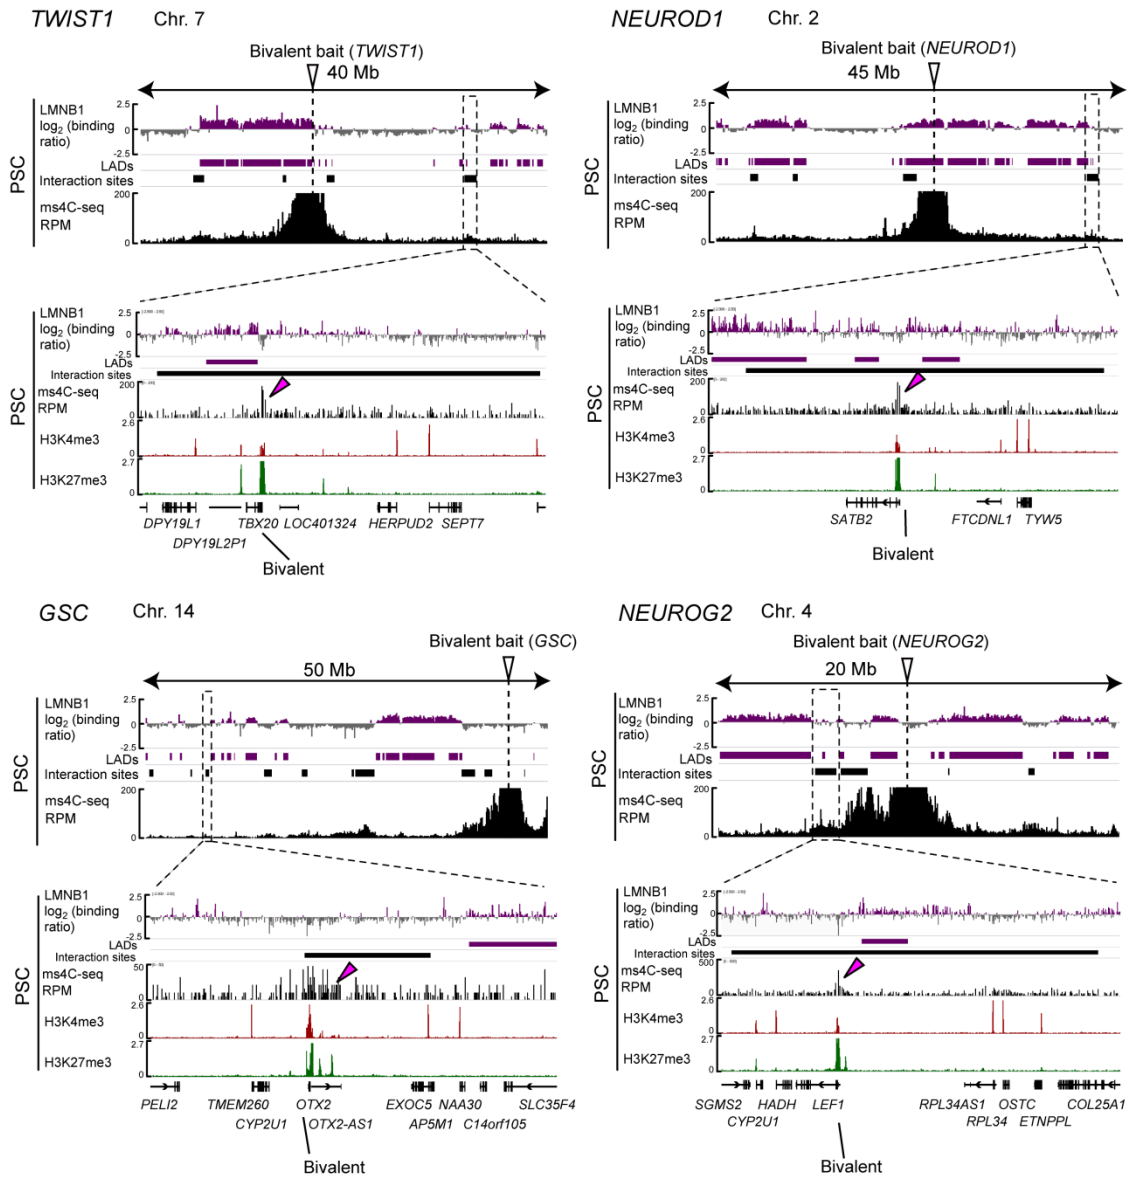

**Supplementary Figure 5. Epigenetic states of the interaction target sites of the bivalent bait locus**

LADs and histone modifications at interaction target sites of bivalent gene loci (*TWIST1*, *NEUROD1*, *GSC* and *NEUROG2*) in hPSCs. Lamina association signals in PSCs (ESCs) are shown as described in Fig. 2f. ChIP-seq data are represented by RPM signals for H3K4me3 (red) and H3K27me3 (green) in PSCs (ESCs) below ms3C-seq interaction signals in PSCs (iPSCs) (black).

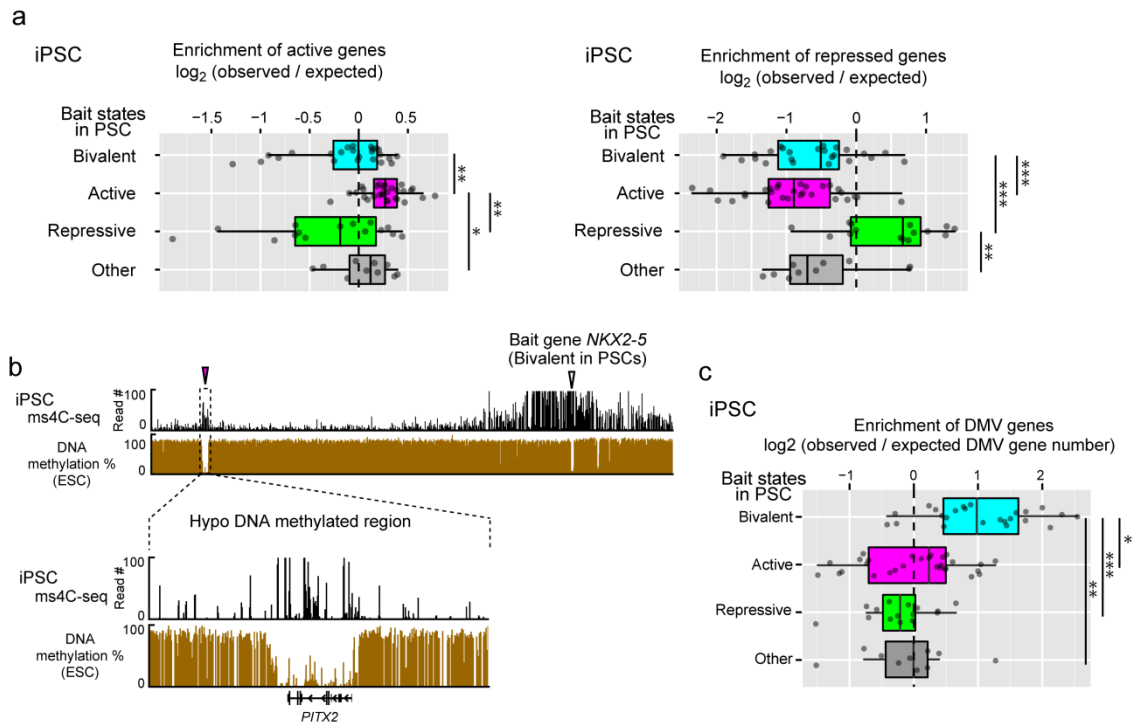

**Supplementary Figure 6. Analysis of gene states in the interaction target genes of the bivalent bait locus**

(a) The enrichment of active and repressive genes in the interaction target genes of bivalent bait loci in iPSCs (428C2). Box plots show  $\log_2(\text{observed frequency for active (left panel) or repressive genes (right panel)}/(\text{expected frequency for active (left panel) or repressive genes (right panel)})$  in the interaction targets of bivalent, active, repressive and other bait gene loci (U-test, \*  $p < 5 \times 10^{-2}$ , \*\*  $p < 4 \times 10^{-3}$ , \*\*\*  $p < 3 \times 10^{-5}$ ).

(b) Enrichment of ms3C-seq interaction signals in DNA methylation valleys in iPSCs. DNA methylation percentages at the interaction target sites of the bivalent gene (*NKX2-5*) locus are shown under the ms3C-seq signals.

(c) Enrichment of DMV genes in the interaction sites of bivalent genes in iPSCs (428C2). Box plots show  $\log_2(\text{observed frequency for DMV genes})/(\text{expected frequency for DMV genes})$  in interaction targets of bivalent, active, repressive and other bait gene loci in PSCs (U-test, \* $p < 1 \times 10^{-4}$ , \*\* $p < 1 \times 10^{-5}$ , \*\*\* $p < 1 \times 10^{-7}$ ).

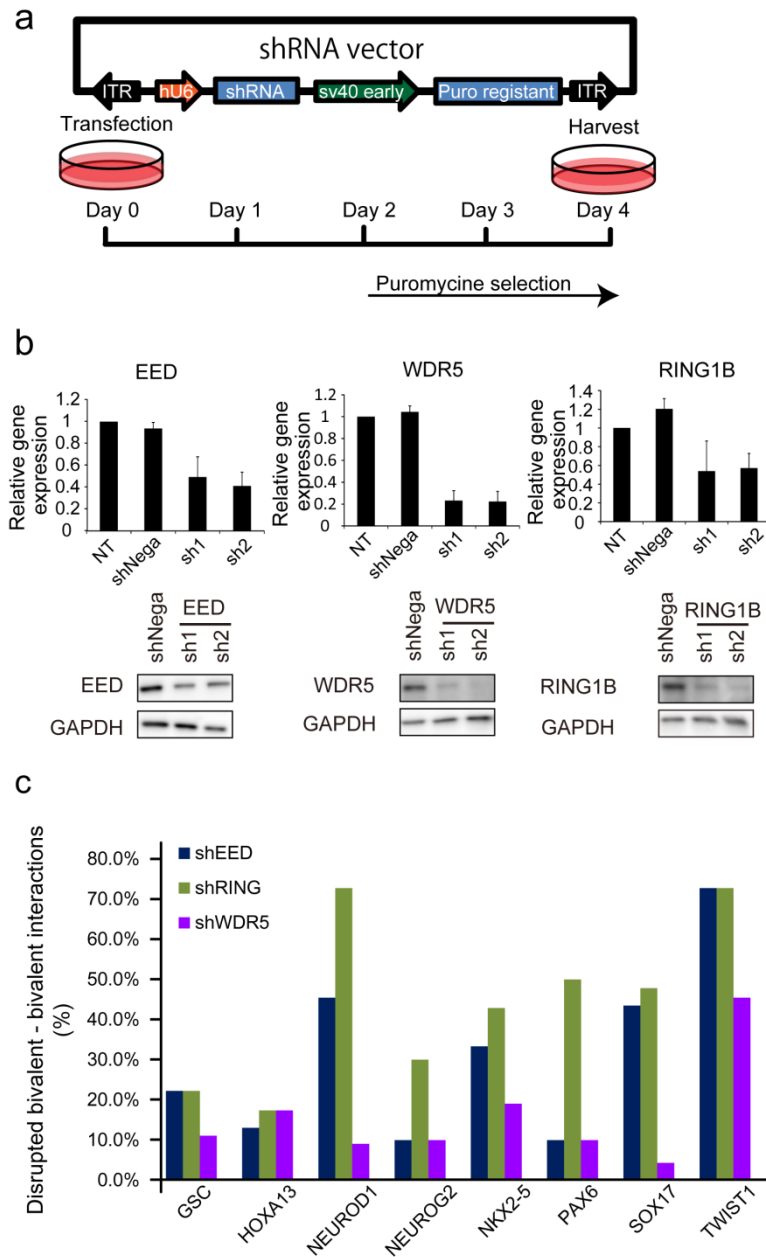

**Supplementary Figure 7. shRNA ms3C-seq analysis**

(a) Schematic diagram of knockdown experiments by shRNA.

(b) Analysis of the knockdown efficiencies of each shRNA in hiPSCs by qPCR (upper panels) and immunoblotting (lower panels). Error bars indicate standard deviation (n = 3).

(c) Percentages of bivalent genes with interaction signals that were reduced more than 30% in both independent shRNA knockdown experiments (sh1 and sh2) for EED, WDR5 and RING1B compared to shNega treatment in each bivalent bait.

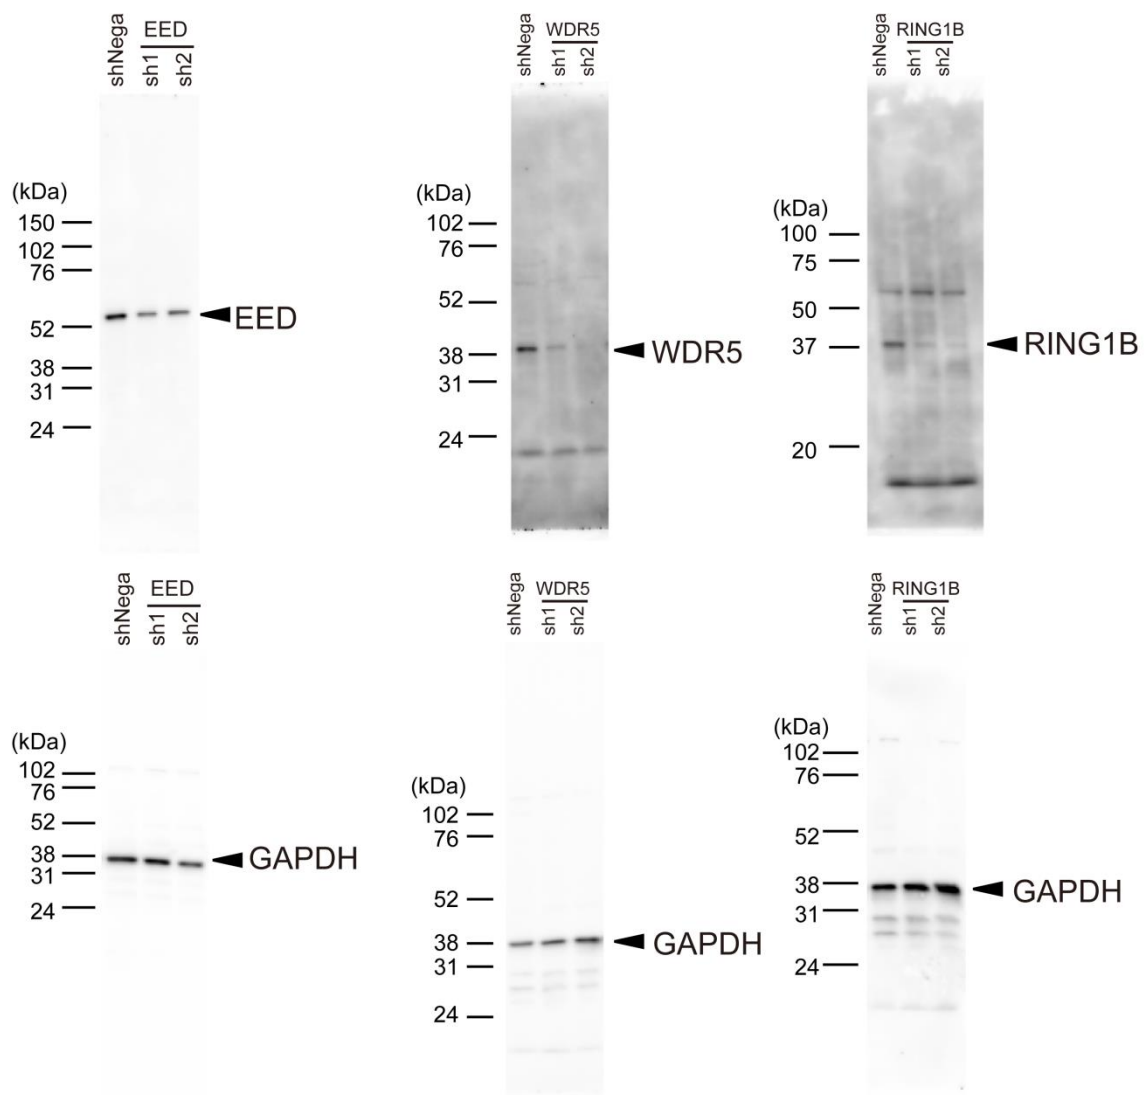

**Supplementary Figure 8. Full-length images of immunoblots in Supplementary Figure 7.**

## Supplementary Table 1. Primers and target sequences for shRNA

### List of bait and adapter primers for ms4C-seq

| Bait          | 1st PCR primer sequence (5' to 3') | 2nd PCR primer sequence (5' to 3')                        |
|---------------|------------------------------------|-----------------------------------------------------------|
| <i>ASCL1</i>  | TCATTTCTGCCACTTAGCATGT             | ACACTCTTTCCCTACACGACGCTCTTCCGATCTATCCACCTCTTCCCTTTGAC     |
| <i>ASCL2</i>  | CTCGCTAGCTTTGGGTTTTG               | ACACTCTTTCCCTACACGACGCTCTTCCGATCTCGGCTCTTGAAAGGAACAAG     |
| <i>COL2A1</i> | AGCGGGATTCTCTCATCCTG               | ACACTCTTTCCCTACACGACGCTCTTCCGATCTCCCAGCCACTTTCTAGTG       |
| <i>DPPA4</i>  | TCGGGTCTTAGAAGCCAGAG               | ACACTCTTTCCCTACACGACGCTCTTCCGATCTTGTGCAAATCCTGCACTTC      |
| <i>EOMES</i>  | CTTCAACGCACAGAACCACT               | ACACTCTTTCCCTACACGACGCTCTTCCGATCTCCAGTGGGAAAGGTTTGTAG     |
| <i>ERCC3</i>  | CCTACCCCATGTAGTGAATC               | ACACTCTTTCCCTACACGACGCTCTTCCGATCTCAGTTTGTTCCTCAAATAATGG   |
| <i>ETS2</i>   | ATCATTTCTCATGTGTAAGC               | ACACTCTTTCCCTACACGACGCTCTTCCGATCTCTGGCAGTGGTGGCTATTTTC    |
| <i>EVX1</i>   | AAATGGAATTCGCAGAAAG                | ACACTCTTTCCCTACACGACGCTCTTCCGATCTGCAGCGGGACTCGGTAAT       |
| <i>FOXA2</i>  | ATGCATAGGAACTAGTGGGC               | ACACTCTTTCCCTACACGACGCTCTTCCGATCTGCAGAAGACAGGCGAGATG      |
| <i>FOXF1</i>  | ACGTGTAACACACCCATGC                | ACACTCTTTCCCTACACGACGCTCTTCCGATCTATGTGCGCACCCACTAATG      |
| <i>GAPDH</i>  | CCTGCCCTTTGAGTTTGATG               | ACACTCTTTCCCTACACGACGCTCTTCCGATCTCATAGTGGGGTGGTGAATAC     |
| <i>GATA4</i>  | CAAAGGGAAAAGTTGGTGACC              | ACACTCTTTCCCTACACGACGCTCTTCCGATCTGGAATGAACTATTTGCCAAACC   |
| <i>GATA5</i>  | GATGGCGGACAGCTCTTG                 | ACACTCTTTCCCTACACGACGCTCTTCCGATCTCCCCACTTTCTCTAGGCACA     |
| <i>GATA6</i>  | CCAATGACCGACGAAAGATT               | ACACTCTTTCCCTACACGACGCTCTTCCGATCTAAGGTGTCTTCCGTGATCG      |
| <i>GSC</i>    | AACGAAGCCCTTCGCTAACT               | ACACTCTTTCCCTACACGACGCTCTTCCGATCTAAACGTCAAGGGGATTTGAA     |
| <i>HNF4A</i>  | CCTCCTTCTTTTCTTTGGG                | ACACTCTTTCCCTACACGACGCTCTTCCGATCTGAGCATGTGTTCTTGGCTGT     |
| <i>HOXA13</i> | AGGAAGTGTGGGGACCTTCGG              | ACACTCTTTCCCTACACGACGCTCTTCCGATCTCCTGGTAGTGATAGAGGTGATCTC |
| <i>KLF4</i>   | ACCCGAATTGCTTTGAAATG               | ACACTCTTTCCCTACACGACGCTCTTCCGATCTAAGGAGCTTGACGCTTTTAC     |
| <i>LHX1</i>   | TCCTACCCTCCCCTCTTTCC               | ACACTCTTTCCCTACACGACGCTCTTCCGATCTGATGCCGGCAGTTTAGGAT      |

|                     |                         |                                                           |
|---------------------|-------------------------|-----------------------------------------------------------|
| <i>MESP1</i>        | AGGGACCCTCATTCCCTCTA    | ACACTCTTCCCTACACGACGCTCTTCCGATCTGTAGACCCTTCCCTGGTAAG      |
| <i>MIXL1</i>        | CCGGCTGAAACTGGTAAC      | ACACTCTTCCCTACACGACGCTCTTCCGATCTTCATGAGGATTCATTCTACGACTC  |
| <i>NANOG</i>        | TTTGTTAAGTGGGGGCTGTC    | ACACTCTTCCCTACACGACGCTCTTCCGATCTCTCACCGAGGCTGAGCTTG       |
| <i>NANOG-P</i>      | TTTGTTAAGTGGGGGCTGTC    | ACACTCTTCCCTACACGACGCTCTTCCGATCTCTCACCGAGGCTGAGCTTG       |
| <i>NEUROD1</i>      | AACGAACCCACTGTGCTTAC    | ACACTCTTCCCTACACGACGCTCTTCCGATCTTGGTACTACTGCTGCAAAGTG     |
| <i>NEUROD4</i>      | GGGCAGTTAGTTCCTTGAGTTAC | ACACTCTTCCCTACACGACGCTCTTCCGATCTTTAAGCATTACAGTAGAAAAAGTCC |
| <i>NEUROG2</i>      | GGAGCTGAGTGCGTGTAGTG    | ACACTCTTCCCTACACGACGCTCTTCCGATCTGAGAGGGTGGGGATCTTTAG      |
| <i>NKX2-5</i>       | AGCTACATGGCCAGATCCTG    | ACACTCTTCCCTACACGACGCTCTTCCGATCTCACTCCTTGGGAGGTCTGAT      |
| <i>NR2F2</i>        | AAAGGGGTCCCGATTAAGA     | ACACTCTTCCCTACACGACGCTCTTCCGATCTTAGCAGGGCTTGGAACCTAG      |
| <i>PAX3</i>         | TGAAAAGGGGGCTCAGAGAG    | ACACTCTTCCCTACACGACGCTCTTCCGATCTGGCTCGGGAGCATTATTAG       |
| <i>PAX6</i>         | GGCCTGGCTATCTTGAATGG    | ACACTCTTCCCTACACGACGCTCTTCCGATCTCGTCCCTCATCCCTCAAAC       |
| <i>POU5F1</i>       | TCCAGGTGGTGGAGGTGATG    | ACACTCTTCCCTACACGACGCTCTTCCGATCTTGGTTGATCCTCGGACCTG       |
| <i>Intergenic 1</i> | AACCAGGAAGGAGGGAGAGA    | ACACTCTTCCCTACACGACGCTCTTCCGATCTAAGAATTCGGAGAGCCACC       |
| <i>Intergenic 2</i> | GAGAGATGGAGGCATTTTGC    | ACACTCTTCCCTACACGACGCTCTTCCGATCTCAAGTCAGTAGGGGGCTAAG      |
| <i>Intergenic 3</i> | TTACAGGCAGGACAAGAGCC    | ACACTCTTCCCTACACGACGCTCTTCCGATCTACTCAGTGACTGCGCTGG        |
| <i>Intergenic 4</i> | TAGTCAGTGGGGAGGGACAC    | ACACTCTTCCCTACACGACGCTCTTCCGATCTGCTTTTCAAGGTAATGTCAGCC    |
| <i>Intergenic 5</i> | ACCTCCCAGCCAAGAACC      | ACACTCTTCCCTACACGACGCTCTTCCGATCTAGGCGATAACGAGGTGAGAG      |
| <i>SNAI1</i>        | TTGGTGTACATAGAGGAGTGGG  | ACACTCTTCCCTACACGACGCTCTTCCGATCTTCTTTGGTAAGGGAGGAGGG      |
| <i>SOX1</i>         | TCAGTCTCCAAGATGCTGG     | ACACTCTTCCCTACACGACGCTCTTCCGATCTGAGACACGTTGGAATTGGAC      |
| <i>SOX17</i>        | CCTTGGCTAGGGGACAAGTT    | ACACTCTTCCCTACACGACGCTCTTCCGATCTTGGTAGTTTTGAAAGCGGTTG     |
| <i>SOX2</i>         | AGACGCCACAAAGGGCAGAC    | ACACTCTTCCCTACACGACGCTCTTCCGATCTTGATTGTGTATGCATCGGTCTGC   |
| <i>SOX7</i>         | CATCTCAGAGGAAGGCTGTC    | ACACTCTTCCCTACACGACGCTCTTCCGATCTAGACCCTGAGGAACGAATCC      |



|               |                          |                                                            |
|---------------|--------------------------|------------------------------------------------------------|
| <i>SST</i>    | TCCTGAGACCTTCAGTGCCT     | ACACTCTTCCCTACACGACGCTCTTCCGATCTGAAGTGGCATGGTCACAGG        |
| <i>T</i>      | TTGTTCCCGCTCTGGTTAAC     | ACACTCTTCCCTACACGACGCTCTTCCGATCTCATTTCTACAAGCCCCTCTTC      |
| <i>TBX6</i>   | AGAAAAAGAGAAGCCCCTCG     | ACACTCTTCCCTACACGACGCTCTTCCGATCTAGACAGTAGCAGGGTCCCAC       |
| <i>TCF21</i>  | AGCTGCCACATGAAATGAAC     | ACACTCTTCCCTACACGACGCTCTTCCGATCTAGAAAACTGGCTTGAGTGATG      |
| <i>TWIST1</i> | AAGGATGGCTCCCTTTTAC      | ACACTCTTCCCTACACGACGCTCTTCCGATCTAATTCTGGATTCTTTATATATGCAAC |
| <i>ZIC1</i>   | TAGATCCAATTGTATTAGGATTAC | ACACTCTTCCCTACACGACGCTCTTCCGATCTTCCACTGCAGATGTAAGAATTT     |
| <i>LIN28B</i> | GGGGCTTCTGCAAACCTAT      | ACACTCTTCCCTACACGACGCTCTTCCGATCTTACCGCCACACTGATTAC         |
| <i>YTHDF2</i> | TAGCTTGAGCATGTGGGAGC     | ACACTCTTCCCTACACGACGCTCTTCCGATCTCTGTGTCTTGGCATAACCTGTG     |
| <i>YBX1</i>   | AGTGCCATCTCAGCATTGTC     | ACACTCTTCCCTACACGACGCTCTTCCGATCTGTGGAATGGACAACAAATGGGC     |
| <i>ZZZ3</i>   | AGCCAAGTGAAAGGGATGG      | ACACTCTTCCCTACACGACGCTCTTCCGATCTGGAGCCCCTGAGATCCTCAA       |
| <i>MYCN</i>   | AGAAGGTACTGCAGAGTCAAGG   | ACACTCTTCCCTACACGACGCTCTTCCGATCTCGGGGAGAGGACTGGAGTTC       |
| <i>MITD1</i>  | CGTTGCGTTAAAGTGGAAGTGC   | ACACTCTTCCCTACACGACGCTCTTCCGATCTCCACAGTGAACCAGATCCCA       |
| <i>DPH3</i>   | ATAGGCAATGACGCAACTCC     | ACACTCTTCCCTACACGACGCTCTTCCGATCTGGTAGCGGTCACCATGGAG        |
| <i>ZFP42</i>  | GGTCGTATAAGTACACCCAGACC  | ACACTCTTCCCTACACGACGCTCTTCCGATCTCCAGACCATTAGAACGAAACCC     |
| <i>KIF2A</i>  | TGGTGGAAGGCAGGAGATTAG    | ACACTCTTCCCTACACGACGCTCTTCCGATCTTGCATTGGACAGTAGTGTTTCAC    |
| <i>PTPRZ1</i> | AGCATTACAAGAAGTATGCAGGTG | ACACTCTTCCCTACACGACGCTCTTCCGATCTACTGACTGTGCACTGAGAGTTC     |
| <i>PODXL</i>  | AAAACTGAAGCCCCAGTGC      | ACACTCTTCCCTACACGACGCTCTTCCGATCTAAGATTTGGAAGGGGTGGTCTG     |
| <i>TAF2</i>   | AAGTCACGTCTCGCAGCTG      | ACACTCTTCCCTACACGACGCTCTTCCGATCTCAACCTCGCTCCTTCGACTA       |
| <i>FGFR2</i>  | GCCCTCCCGCTAAAGAGAC      | ACACTCTTCCCTACACGACGCTCTTCCGATCTCTGCTTGATACTGCGGGGAG       |
| <i>STX5</i>   | TCCAAGGATGCCAAAGTTC      | ACACTCTTCCCTACACGACGCTCTTCCGATCTGGTTCTTGAGGCTCTTGGGG       |
| <i>BCAT1</i>  | GAAGAGTTGACCCGGGTGG      | ACACTCTTCCCTACACGACGCTCTTCCGATCTGTTAAAAGCAGAAGGCCCT        |
| <i>METAP2</i> | TGGATTGTGATTGGCTGCCT     | ACACTCTTCCCTACACGACGCTCTTCCGATCTTGTCCACCTGGAGAGTTTAGG      |
| <i>KDM2B</i>  | ATACGACGAGAACGAGGACTTG   | ACACTCTTCCCTACACGACGCTCTTCCGATCTTGTCCGACGTGGAGGAGATC       |

|                  |                          |                                                           |
|------------------|--------------------------|-----------------------------------------------------------|
| <i>NCL</i>       | TACCAGGTACCCCCACGTG      | ACACTCTTCCCTACACGACGCTCTCCGATCTGGTTGTCTCGCTGGGAAAGG       |
| <i>LIG1</i>      | TCTGTGATATTCTGCCCTTTGT   | ACACTCTTCCCTACACGACGCTCTCCGATCTGCTAATTTATGTAGACCAGCGGG    |
| <i>DNMT3B</i>    | AAGCCOCTGTTTCATGCTCTC    | ACACTCTTCCCTACACGACGCTCTCCGATCTAGTCTGGACCCCGGGAAG         |
| <i>SALL4</i>     | CATTTTGGGTGGGCGCAC       | ACACTCTTCCCTACACGACGCTCTCCGATCTCTTTGGTGGTGTGGCAC          |
| <i>ACO2</i>      | AGAGTTTCATGCACCTGCCA     | ACACTCTTCCCTACACGACGCTCTCCGATCTGAGAGCAAGACGGGCCTG         |
| <i>ARHGEF38</i>  | AGCGGTTTAGTTAGAAGGGAGC   | ACACTCTTCCCTACACGACGCTCTCCGATCTAATCAGCCATTGCCTGCAAG       |
| <i>SLC34A1</i>   | TTCTCAGGTTCAAGCTCTGGG    | ACACTCTTCCCTACACGACGCTCTCCGATCTAGTTTCTGGGTTCGGGTGTC       |
| <i>GIMAP1</i>    | GCCCCTGAGGAGACATCTGA     | ACACTCTTCCCTACACGACGCTCTCCGATCTCTTCAACCCCTTCCCTGC         |
| <i>PRSS3</i>     | GCACACTATTAAGAACAACAAGCG | ACACTCTTCCCTACACGACGCTCTCCGATCTCCTCCCTCTCAGACCTACTG       |
| <i>HEMGN</i>     | TCCTGTTGGGAGTGGGAAAC     | ACACTCTTCCCTACACGACGCTCTCCGATCTGAAGCCTCCAAGATTGTTGCG      |
| <i>TNFSF8</i>    | AGGCGAAAGAGAAGACCATGG    | ACACTCTTCCCTACACGACGCTCTCCGATCTTGGCTTCTTAGAGCTTTGGACA     |
| <i>OBP2B</i>     | TCATGTACCTGCAGGAGCTG     | ACACTCTTCCCTACACGACGCTCTCCGATCTTACTGCAAAGACCAGCACC        |
| <i>ANKRD1</i>    | AGGCGAAACTCATCAAAAGTACC  | ACACTCTTCCCTACACGACGCTCTCCGATCTTCCCTAAAAGAAATGTGATTAAGCAG |
| <i>SOX6</i>      | GCCAGTTAAATCAAATCATGGCAC | ACACTCTTCCCTACACGACGCTCTCCGATCTTAGGGCAATGTTGGATAAAGTC     |
| <i>FLRT1</i>     | CGTTCCACAGGCTCCAG        | ACACTCTTCCCTACACGACGCTCTCCGATCTAGGTCTGGTCTCTGTGCTCA       |
| <i>KRTAP5-11</i> | GTTCCCATGCCCTGGTG        | ACACTCTTCCCTACACGACGCTCTCCGATCTAGCATTCTCCAGCCCTTC         |
| <i>GAST</i>      | GGGACAGCCTCACCTTAAG      | ACACTCTTCCCTACACGACGCTCTCCGATCTGCTGATCTTGCCTGGCTC         |
| <i>DEFB132</i>   | TCCTCCCTGACCGTGAAGAC     | ACACTCTTCCCTACACGACGCTCTCCGATCTTCCCACCCCTGTTTTACC         |
| <i>MC3R</i>      | TGCAATTGTGTGTTTATCTTGAC  | ACACTCTTCCCTACACGACGCTCTCCGATCTAACCATTCTTTCTTGCTTTGG      |
| <i>VPREB1</i>    | TATGACCTGTTGCTCCTCCC     | ACACTCTTCCCTACACGACGCTCTCCGATCTGGCAGTGGGGAACCTAACCG       |
| <i>PRAME</i>     | ACAGGGAGATTGCACAGCTC     | ACACTCTTCCCTACACGACGCTCTCCGATCTAAGCGGGGATCCCATGGAAG       |
| <i>IGLL5</i>     | TCAGGCAAGGAAGAGTGGTG     | ACACTCTTCCCTACACGACGCTCTCCGATCTATCTAGACCTAGGTTACCTCTGGG   |

|              |                      |                                                      |
|--------------|----------------------|------------------------------------------------------|
| <i>COLQ</i>  | GAGGGTGGGCAGGAAAGG   | ACACTCTTCCCTACACGACGCTCTTCCGATCTCCACATGCCCTGCAAATTC  |
| <i>CBLN2</i> | GAACCGGACAGTCCCAAC   | ACACTCTTCCCTACACGACGCTCTTCCGATCTGACTCTGGAACACAGCTCC  |
| <i>TREM1</i> | GAAGAGGACTGAGCAGGGGA | ACACTCTTCCCTACACGACGCTCTTCCGATCTGTTTGGTCCAGGATCTCGGG |

**Adaptor primers for  
ms4C-seq**

| Name                                         | Primer sequence (5' to 3')                             |
|----------------------------------------------|--------------------------------------------------------|
| 1st PCR adaptor primer                       | CGAAGAGTAACCGTTGCTAGG                                  |
| 2nd PCR adaptor primer (P5)                  | AATGATACGGCGACCACCGAGATCTACACTCTTCCCTACACGAC           |
| 2nd PCR adaptor primer (P7) (NNNNNN = Index) | CAAGCAGAAGACGGCATAACGAGATNNNNNNGTGACTGGAGTTCAGACGTGTGC |

**Target genes of shRNA and target sequence for EED, RING1B and WDR5**

| Target gene |        | Target sequence (5' to 3')                                         |
|-------------|--------|--------------------------------------------------------------------|
| EED sh1     | TOP    | CCGGTGACAGAGATGAAGTTCTAAGTGCCTCGAGGCACTTAGAACTTCATCTCTGTGCTTTTTTC  |
|             | BOTTOM | AATTGAAAAAAGCACAGAGATGAAGTTCTAAGTGCCTCGAGGCACTTAGAACTTCATCTCTGTGCA |
| EED sh2     | TOP    | CCGGTGGATCATTCTCTTAACTTTGGAGCTCGAGCTCCAAAGTTTAAGAGAATGATCCTTTTTTC  |
|             | BOTTOM | AATTGAAAAAAGGATCATTCTCTTAACTTTGGAGCTCGAGCTCCAAAGTTTAAGAGAATGATCCA  |
| RING1B sh1  | TOP    | CCGGTGGCTAGAGCTTGATAATAACAATGCTCGAGCATTGTTATTATCAAGCTCTAGCCTTTTTTC |
|             | BOTTOM | AATTGAAAAAAGGCTAGAGCTTGATAATAACAATGCTCGAGCATTGTTATTATCAAGCTCTAGCCA |
| RING1B sh2  | TOP    | CCGGTGACAGACGAGATACATAAAGACTCTCGAGAGTCTTTATGTATCTCGTCTGTGCTTTTTTC  |
|             | BOTTOM | AATTGAAAAAAGCACAGACGAGATACATAAAGACTCTCGAGAGTCTTTATGTATCTCGTCTGTGCA |
| WDR5 sh1    | TOP    | CCGGTGGGTGAAGTTCAATTTAATGCGCTCGAGCGCATGTTAAATTGAACTTCACCTTTTTTC    |

|          |        |                                                                   |
|----------|--------|-------------------------------------------------------------------|
|          | BOTTOM | AATTGAAAAAAGGGTGAAGTTCAATTTAACATGCGCTCGAGCGCATGTAAATTGAACTTCACCCA |
| WDR5 sh2 | TOP    | CCGGTGGGAAGAGTTCCTAGTCTATTGTGCTCGAGCACAATAGACTAGGAACTCTCCCTTTTTTC |
|          | BOTTOM | AATTGAAAAAAGGGAAGAGTTCCTAGTCTATTGTGCTCGAGCACAATAGACTAGGAACTCTCCCA |
| shNega   | TOP    | CCGGTCCTAAGGTTAAGTCGCCCTCGCTCGAGCGAGGGCGACTTAACCTTAGGTTTTTTC      |
|          | BOTTOM | AATTGAAAAAACCTAAGGTTAAGTCGCCCTCGCTCGAGCGAGGGCGACTTAACCTTAGGA      |

#### List of primers for 3C qPCR and enhanced 3C qPCR

| Detection target of interaction | Primer type (target gene name) | Sequences (5' to 3') |
|---------------------------------|--------------------------------|----------------------|
| <i>HOXA13 - HOXA (X)</i>        | Bait (HOXA13)                  | CCTCCACCTGGTAGTGATAG |
|                                 | Interaction Target (HOXA3)     | GTCAAAAATGCGCCAGAACT |
|                                 | Interaction Target (HOXA5)     | GGTTTAGCCACCAACTCCTG |
|                                 | Interaction Target (HOXA10)    | AGCTGCACAAAGGTGCTGTA |
|                                 | Interaction Target (HOXA11)    | CCTCACTCTCAGGCTCTTGG |
| <i>PAX6 - WT1</i>               | Bait (PAX6)                    | GGCTGGCTATCTTGGAATGG |
|                                 | Interaction Target (WT1)       | AGCAAGAGCCAGACTCAAGG |
| <i>NKX2-5 - MSX2</i>            | Bait (NKX2-5)                  | CACTCCTTGGGAGGTCTGAT |
|                                 | Interaction Target (MSX2)      | TTTCATGGGAAGGTCACAGC |
| <i>NEUROG2 - PITX2</i>          | Bait (NEUROG2)                 | AAAGAAAGGGAGCTGAGTGC |
|                                 | Interaction Target (PITX2)     | GGCAGACAGAAAAAGCAAGC |
| <i>TWIST1 - SP8</i>             | Bait (TWIST1)                  | TCCACATTTGCAAGGATGGC |
|                                 | Interaction Target (SP8)       | TGCAACGTAGTGGGTTCCAG |
| <i>GATA5 - HRH3</i>             | Bait (GATA5)                   | CCCCACTTTCTCTAGGCACA |

|                    |                                    |                       |
|--------------------|------------------------------------|-----------------------|
|                    | Interaction Target (HRH3)          | TCAGGGGAATCTGTGCTTTCC |
|                    | Bait (ERCC3 forward)               | CCCTTTGTTCAAGCCAAAA   |
| <i>Intra ERCC3</i> | Interaction Target (ERCC3 reverse) | GCCCTACCCCATGTAGTGAA  |

**List of primers for qPCR analysis**

| Genes  | Directions | Primer sequences (5' to 3') |
|--------|------------|-----------------------------|
| RING1B | Forward    | CACAGCCCTTAGAAGTGGCAA       |
|        | Reverse    | GTCTGGCCTTAGTGATCTTTTGG     |
| WDR5   | Forward    | AATTTGGGGCGCGTATGATG        |
|        | Reverse    | AATCTGACGACCAGGCTACATC      |
| EED    | Forward    | GTGACGAGAACAGCAATCCAG       |
|        | Reverse    | TATCAGGGCGTTCAGTGTTG        |
| GAPDH  | Forward    | ACGAATTTGGCTACAGCAAC        |
|        | Reverse    | CAGTGAGGGTCTCTCTTTC         |

**Supplementary Table 2. Chromatin states of bait genes, observed and expected read numbers of ms4C-seq**

\*Total expected interaction numbers were calculated by preseq software.

Daley, T. & Smith, A. D. Predicting the molecular complexity of sequencing libraries. Nature methods 10, 325-327, doi:10.1038/nmeth.2375 (2013).

| Samples         | Baits         | Gene states<br>in HFs | Gene group<br>in HFs | Gene states<br>in PSCs | Gene group<br>in PSCs | Total<br>observed<br>interactions | Interaction<br>Variety | *Percentage of<br>observed distinct<br>interactions in expected<br>interactions |
|-----------------|---------------|-----------------------|----------------------|------------------------|-----------------------|-----------------------------------|------------------------|---------------------------------------------------------------------------------|
| HF (TIG120) Ex1 | <i>ERCC3</i>  | 1_Active_Promoter     | Active               | 1_Active_Promoter      | Active                | 62,734                            | 5,893                  | 52.82596029                                                                     |
| HF (TIG120) Ex1 | <i>GAPDH</i>  | 1_Active_Promoter     | Active               | 1_Active_Promoter      | Active                | 993,064                           | 10,834                 | 92.833946                                                                       |
| HF (TIG120) Ex1 | <i>TBX6</i>   | 1_Active_Promoter     | Active               | 2_Weak_Promoter        | Active                | 206,958                           | 5,496                  | 83.44340697                                                                     |
| HF (TIG120) Ex1 | <i>FOXF1</i>  | 1_Active_Promoter     | Active               | 3_Poised_Promoter      | Bivalent              | 83,976                            | 4,760                  | 68.06806807                                                                     |
| HF (TIG120) Ex1 | <i>KLF4</i>   | 1_Active_Promoter     | Active               | 3_Poised_Promoter      | Bivalent              | 188,439                           | 9,486                  | 83.56604854                                                                     |
| HF (TIG120) Ex1 | <i>NR2F2</i>  | 1_Active_Promoter     | Active               | 3_Poised_Promoter      | Bivalent              | 238,908                           | 9,660                  | 85.57457213                                                                     |
| HF (TIG120) Ex1 | <i>TCF21</i>  | 1_Active_Promoter     | Active               | 3_Poised_Promoter      | Bivalent              | 1,102,909                         | 21,176                 | 94.76246733                                                                     |
| HF (TIG120) Ex1 | <i>TWIST1</i> | 1_Active_Promoter     | Active               | 3_Poised_Promoter      | Bivalent              | 527,644                           | 13,892                 | 85.49396582                                                                     |
| HF (TIG120) Ex1 | <i>SNAI1</i>  | 2_Weak_Promoter       | Active               | 2_Weak_Promoter        | Active                | 1,240,991                         | 7,719                  | 96.35741749                                                                     |
| HF (TIG120) Ex1 | <i>GATA6</i>  | 2_Weak_Promoter       | Active               | 3_Poised_Promoter      | Bivalent              | 223,296                           | 6,829                  | 83.57197053                                                                     |
| HF (TIG120) Ex1 | <i>MESP1</i>  | 2_Weak_Promoter       | Active               | 3_Poised_Promoter      | Bivalent              | 1,103,097                         | 11,255                 | 94.48534659                                                                     |
| HF (TIG120) Ex1 | <i>SOX2</i>   | 3_Poised_Promoter     | Bivalent             | 1_Active_Promoter      | Active                | 2,523,898                         | 23,056                 | 97.74337277                                                                     |
| HF (TIG120) Ex1 | <i>MIXL1</i>  | 3_Poised_Promoter     | Bivalent             | 2_Weak_Promoter        | Active                | 1,170,054                         | 23,152                 | 95.19697699                                                                     |
| HF (TIG120) Ex1 | <i>COL2A1</i> | 3_Poised_Promoter     | Bivalent             | 3_Poised_Promoter      | Bivalent              | 890,762                           | 17,620                 | 94.48278451                                                                     |



|                 |                     |                   |            |                   |          |           |        |             |
|-----------------|---------------------|-------------------|------------|-------------------|----------|-----------|--------|-------------|
| HF (TIG120) Ex1 | <i>EOMES</i>        | 3_Poised_Promoter | Bivalent   | 3_Poised_Promoter | Bivalent | 489,686   | 19,240 | 87.69011299 |
| HF (TIG120) Ex1 | <i>HOXA13</i>       | 3_Poised_Promoter | Bivalent   | 3_Poised_Promoter | Bivalent | 2,297,370 | 15,214 | 97.07697118 |
| HF (TIG120) Ex1 | <i>NEUROD1</i>      | 3_Poised_Promoter | Bivalent   | 3_Poised_Promoter | Bivalent | 955,650   | 23,533 | 90.81366855 |
| HF (TIG120) Ex1 | <i>NEUROG2</i>      | 3_Poised_Promoter | Bivalent   | 3_Poised_Promoter | Bivalent | 1,186,819 | 25,100 | 94.55819473 |
| HF (TIG120) Ex1 | <i>SOX7</i>         | 3_Poised_Promoter | Bivalent   | 3_Poised_Promoter | Bivalent | 195,390   | 10,031 | 85.66621689 |
| HF (TIG120) Ex1 | <i>ETS2</i>         | 4_Strong_Enhancer | Other      | 2_Weak_Promoter   | Active   | 11,766    | 1,597  | 63.73722861 |
| HF (TIG120) Ex1 | <i>Intergenic 3</i> | 7_Weak_Enhancer   | Other      | 5_Strong_Enhancer | Other    | 286,979   | 18,455 | 77.3525356  |
| HF (TIG120) Ex1 | <i>POU5F1</i>       | 11_Weak_Txn       | Other      | 2_Weak_Promoter   | Active   | 1,219,484 | 13,862 | 90.0270172  |
| HF (TIG120) Ex1 | <i>NANOG_P</i>      | 11_Weak_Txn       | Other      | 11_Weak_Txn       | Other    | 382,846   | 10,383 | 82.23441918 |
| HF (TIG120) Ex1 | <i>NANOG</i>        | 12_Repressed      | Repressive | 2_Weak_Promoter   | Active   | 66,600    | 6,977  | 73.63510675 |
| HF (TIG120) Ex1 | <i>ASCL1</i>        | 12_Repressed      | Repressive | 3_Poised_Promoter | Bivalent | 147,879   | 8,722  | 85.40095956 |
| HF (TIG120) Ex1 | <i>ASCL2</i>        | 12_Repressed      | Repressive | 3_Poised_Promoter | Bivalent | 358,112   | 12,775 | 84.73845501 |
| HF (TIG120) Ex1 | <i>EVX1</i>         | 12_Repressed      | Repressive | 3_Poised_Promoter | Bivalent | 33,899    | 5,582  | 61.96301312 |
| HF (TIG120) Ex1 | <i>FOXA2</i>        | 12_Repressed      | Repressive | 3_Poised_Promoter | Bivalent | 34,872    | 4,509  | 70.05033557 |
| HF (TIG120) Ex1 | <i>GATA4</i>        | 12_Repressed      | Repressive | 3_Poised_Promoter | Bivalent | 422,872   | 13,644 | 88.70396255 |
| HF (TIG120) Ex1 | <i>GATA5</i>        | 12_Repressed      | Repressive | 3_Poised_Promoter | Bivalent | 672,942   | 8,024  | 89.27856157 |
| HF (TIG120) Ex1 | <i>GSC</i>          | 12_Repressed      | Repressive | 3_Poised_Promoter | Bivalent | 401,282   | 11,482 | 89.8449115  |
| HF (TIG120) Ex1 | <i>LHX1</i>         | 12_Repressed      | Repressive | 3_Poised_Promoter | Bivalent | 96,924    | 6,986  | 76.50021901 |
| HF (TIG120) Ex1 | <i>PAX3</i>         | 12_Repressed      | Repressive | 3_Poised_Promoter | Bivalent | 19,278    | 4,456  | 55.48154143 |
| HF (TIG120) Ex1 | <i>PAX6</i>         | 12_Repressed      | Repressive | 3_Poised_Promoter | Bivalent | 1,073,767 | 15,460 | 90.65321919 |
| HF (TIG120) Ex1 | <i>SOX1</i>         | 12_Repressed      | Repressive | 3_Poised_Promoter | Bivalent | 760,801   | 12,669 | 93.15441176 |
| HF (TIG120) Ex1 | <i>SOX17</i>        | 12_Repressed      | Repressive | 3_Poised_Promoter | Bivalent | 561,666   | 13,412 | 90.76021492 |

|                 |                     |                   |            |                   |            |           |        |             |
|-----------------|---------------------|-------------------|------------|-------------------|------------|-----------|--------|-------------|
| HF (TIG120) Ex1 | <i>SST</i>          | 12_Repressed      | Repressive | 3_Poised_Promoter | Bivalent   | 998,996   | 17,179 | 92.94134832 |
| HF (TIG120) Ex1 | <i>T</i>            | 12_Repressed      | Repressive | 3_Poised_Promoter | Bivalent   | 124,368   | 13,178 | 74.7641282  |
| HF (TIG120) Ex1 | <i>ZIC1</i>         | 12_Repressed      | Repressive | 3_Poised_Promoter | Bivalent   | 44,422    | 6,576  | 55.97977373 |
| HF (TIG120) Ex1 | <i>DPPA4</i>        | 13_Heterochrom/lo | Repressive | 1_Active_Promoter | Active     | 685,051   | 19,614 | 88.13577601 |
| HF (TIG120) Ex1 | <i>Intergenic 1</i> | 13_Heterochrom/lo | Repressive | 4_Strong_Enhancer | Other      | 1,284,276 | 23,404 | 93.02066773 |
| HF (TIG120) Ex1 | <i>Intergenic 2</i> | 13_Heterochrom/lo | Repressive | 5_Strong_Enhancer | Other      | 1,583,584 | 16,133 | 94.11222531 |
| HF (TIG120) Ex1 | <i>Intergenic 4</i> | 13_Heterochrom/lo | Repressive | 5_Strong_Enhancer | Other      | 1,332,349 | 12,728 | 95.03117184 |
| HF (TIG120) Ex1 | <i>Intergenic 5</i> | 13_Heterochrom/lo | Repressive | 5_Strong_Enhancer | Other      | 1,098,083 | 21,392 | 89.86385156 |
| HF (TIG120) Ex1 | <i>NEUROD4</i>      | 13_Heterochrom/lo | Repressive | 6_Weak_Enhancer   | Other      | 714,361   | 16,238 | 94.23111519 |
| HF (TIG120) Ex1 | <i>HNF4A</i>        | 13_Heterochrom/lo | Repressive | 13_Heterochrom/lo | Repressive | 146,816   | 7,243  | 78.46132181 |
| HF (TIG120) Ex1 | <i>NKX2-5</i>       | 14_Repetitive/CNV | Other      | 3_Poised_Promoter | Bivalent   | 928,351   | 17,519 | 90.58334454 |
| HF (TIG120) Ex2 | <i>ERCC3</i>        | 1_Active_Promoter | Active     | 1_Active_Promoter | Active     | 64,406    | 5,514  | 57.90861068 |
| HF (TIG120) Ex2 | <i>GAPDH</i>        | 1_Active_Promoter | Active     | 1_Active_Promoter | Active     | 1,305,704 | 11,583 | 94.0751269  |
| HF (TIG120) Ex2 | <i>TBX6</i>         | 1_Active_Promoter | Active     | 2_Weak_Promoter   | Active     | 360,681   | 6,413  | 86.83348228 |
| HF (TIG120) Ex2 | <i>FOXF1</i>        | 1_Active_Promoter | Active     | 3_Poised_Promoter | Bivalent   | 111,397   | 4,997  | 67.34682876 |
| HF (TIG120) Ex2 | <i>KLF4</i>         | 1_Active_Promoter | Active     | 3_Poised_Promoter | Bivalent   | 267,802   | 10,378 | 83.52716766 |
| HF (TIG120) Ex2 | <i>NR2F2</i>        | 1_Active_Promoter | Active     | 3_Poised_Promoter | Bivalent   | 389,266   | 10,073 | 87.68508927 |
| HF (TIG120) Ex2 | <i>TCF21</i>        | 1_Active_Promoter | Active     | 3_Poised_Promoter | Bivalent   | 1,502,189 | 21,495 | 96.24684326 |
| HF (TIG120) Ex2 | <i>TWIST1</i>       | 1_Active_Promoter | Active     | 3_Poised_Promoter | Bivalent   | 747,264   | 14,526 | 91.28328233 |
| HF (TIG120) Ex2 | <i>SNAI1</i>        | 2_Weak_Promoter   | Active     | 2_Weak_Promoter   | Active     | 1,744,747 | 8,004  | 96.64682372 |
| HF (TIG120) Ex2 | <i>GATA6</i>        | 2_Weak_Promoter   | Active     | 3_Poised_Promoter | Bivalent   | 347,045   | 7,347  | 87.05388881 |
| HF (TIG120) Ex2 | <i>MESP1</i>        | 2_Weak_Promoter   | Active     | 3_Poised_Promoter | Bivalent   | 1,462,650 | 11,856 | 95.37983798 |

|                 |                     |                   |            |                   |          |           |        |             |
|-----------------|---------------------|-------------------|------------|-------------------|----------|-----------|--------|-------------|
| HF (TIG120) Ex2 | <i>SOX2</i>         | 3_Poised_Promoter | Bivalent   | 1_Active_Promoter | Active   | 3,165,556 | 24,478 | 98.73545368 |
| HF (TIG120) Ex2 | <i>MIXL1</i>        | 3_Poised_Promoter | Bivalent   | 2_Weak_Promoter   | Active   | 1,521,050 | 25,001 | 96.54647755 |
| HF (TIG120) Ex2 | <i>COL2A1</i>       | 3_Poised_Promoter | Bivalent   | 3_Poised_Promoter | Bivalent | 1,110,217 | 18,727 | 94.91396569 |
| HF (TIG120) Ex2 | <i>EOMES</i>        | 3_Poised_Promoter | Bivalent   | 3_Poised_Promoter | Bivalent | 649,137   | 19,666 | 89.09083496 |
| HF (TIG120) Ex2 | <i>HOXA13</i>       | 3_Poised_Promoter | Bivalent   | 3_Poised_Promoter | Bivalent | 2,719,822 | 16,390 | 98.03393805 |
| HF (TIG120) Ex2 | <i>NEUROD1</i>      | 3_Poised_Promoter | Bivalent   | 3_Poised_Promoter | Bivalent | 1,936,121 | 26,532 | 95.44193877 |
| HF (TIG120) Ex2 | <i>NEUROG2</i>      | 3_Poised_Promoter | Bivalent   | 3_Poised_Promoter | Bivalent | 1,522,296 | 26,580 | 95.57231926 |
| HF (TIG120) Ex2 | <i>SOX7</i>         | 3_Poised_Promoter | Bivalent   | 3_Poised_Promoter | Bivalent | 337,013   | 11,012 | 89.02398603 |
| HF (TIG120) Ex2 | <i>ETS2</i>         | 4_Strong_Enhancer | Other      | 2_Weak_Promoter   | Active   | 20,772    | 1,876  | 70.54753309 |
| HF (TIG120) Ex2 | <i>Intergenic 3</i> | 7_Weak_Enhancer   | Other      | 5_Strong_Enhancer | Other    | 462,219   | 21,786 | 85.98594134 |
| HF (TIG120) Ex2 | <i>POU5F1</i>       | 11_Weak_Txn       | Other      | 2_Weak_Promoter   | Active   | 1,674,996 | 15,716 | 93.24070174 |
| HF (TIG120) Ex2 | <i>NANOG_P</i>      | 11_Weak_Txn       | Other      | 11_Weak_Txn       | Other    | 371,934   | 11,465 | 81.49180106 |
| HF (TIG120) Ex2 | <i>NANOG</i>        | 12_Repressed      | Repressive | 2_Weak_Promoter   | Active   | 83,769    | 7,352  | 76.05805737 |
| HF (TIG120) Ex2 | <i>ASCL1</i>        | 12_Repressed      | Repressive | 3_Poised_Promoter | Bivalent | 180,072   | 8,544  | 82.70094471 |
| HF (TIG120) Ex2 | <i>ASCL2</i>        | 12_Repressed      | Repressive | 3_Poised_Promoter | Bivalent | 581,831   | 14,415 | 87.34193322 |
| HF (TIG120) Ex2 | <i>EVX1</i>         | 12_Repressed      | Repressive | 3_Poised_Promoter | Bivalent | 53,455    | 6,309  | 60.71425134 |
| HF (TIG120) Ex2 | <i>FOXA2</i>        | 12_Repressed      | Repressive | 3_Poised_Promoter | Bivalent | 56,121    | 5,317  | 77.96644965 |
| HF (TIG120) Ex2 | <i>GATA4</i>        | 12_Repressed      | Repressive | 3_Poised_Promoter | Bivalent | 559,262   | 14,728 | 92.92817122 |
| HF (TIG120) Ex2 | <i>GATA5</i>        | 12_Repressed      | Repressive | 3_Poised_Promoter | Bivalent | 1,005,673 | 8,792  | 94.25284892 |
| HF (TIG120) Ex2 | <i>GSC</i>          | 12_Repressed      | Repressive | 3_Poised_Promoter | Bivalent | 724,680   | 12,042 | 93.79819601 |
| HF (TIG120) Ex2 | <i>LHX1</i>         | 12_Repressed      | Repressive | 3_Poised_Promoter | Bivalent | 164,191   | 7,764  | 82.09184051 |
| HF (TIG120) Ex2 | <i>PAX3</i>         | 12_Repressed      | Repressive | 3_Poised_Promoter | Bivalent | 30,202    | 5,266  | 53.95657653 |

|                 |                     |                   |            |                   |            |           |        |             |
|-----------------|---------------------|-------------------|------------|-------------------|------------|-----------|--------|-------------|
| HF (TIG120) Ex2 | <i>PAX6</i>         | 12_Repressed      | Repressive | 3_Poised_Promoter | Bivalent   | 1,388,857 | 15,915 | 92.94027646 |
| HF (TIG120) Ex2 | <i>SOX1</i>         | 12_Repressed      | Repressive | 3_Poised_Promoter | Bivalent   | 1,112,744 | 13,361 | 94.70915973 |
| HF (TIG120) Ex2 | <i>SOX17</i>        | 12_Repressed      | Repressive | 3_Poised_Promoter | Bivalent   | 691,844   | 13,248 | 93.82170477 |
| HF (TIG120) Ex2 | <i>SST</i>          | 12_Repressed      | Repressive | 3_Poised_Promoter | Bivalent   | 1,234,637 | 18,414 | 93.93603942 |
| HF (TIG120) Ex2 | <i>T</i>            | 12_Repressed      | Repressive | 3_Poised_Promoter | Bivalent   | 198,844   | 15,793 | 76.30205817 |
| HF (TIG120) Ex2 | <i>ZIC1</i>         | 12_Repressed      | Repressive | 3_Poised_Promoter | Bivalent   | 67,138    | 7,316  | 59.08958744 |
| HF (TIG120) Ex2 | <i>DPPA4</i>        | 13_Heterochrom/lo | Repressive | 1_Active_Promoter | Active     | 846,550   | 20,694 | 92.30892757 |
| HF (TIG120) Ex2 | <i>Intergenic 1</i> | 13_Heterochrom/lo | Repressive | 4_Strong_Enhancer | Other      | 1,762,150 | 23,918 | 93.49944685 |
| HF (TIG120) Ex2 | <i>Intergenic 2</i> | 13_Heterochrom/lo | Repressive | 5_Strong_Enhancer | Other      | 1,972,301 | 17,117 | 95.75247674 |
| HF (TIG120) Ex2 | <i>Intergenic 4</i> | 13_Heterochrom/lo | Repressive | 5_Strong_Enhancer | Other      | 1,691,528 | 13,232 | 95.94663186 |
| HF (TIG120) Ex2 | <i>Intergenic 5</i> | 13_Heterochrom/lo | Repressive | 5_Strong_Enhancer | Other      | 1,436,111 | 25,520 | 92.67631924 |
| HF (TIG120) Ex2 | <i>NEUROD4</i>      | 13_Heterochrom/lo | Repressive | 6_Weak_Enhancer   | Other      | 824,843   | 16,230 | 93.01339324 |
| HF (TIG120) Ex2 | <i>HNF4A</i>        | 13_Heterochrom/lo | Repressive | 13_Heterochrom/lo | Repressive | 259,364   | 8,085  | 87.69836535 |
| HF (TIG120) Ex2 | <i>NKX2-5</i>       | 14_Repetitive/CNV | Other      | 3_Poised_Promoter | Bivalent   | 1,469,831 | 19,231 | 94.60582954 |
| iPS (428C2) Ex1 | <i>ACO2</i>         | 1_Active_Promoter | Active     | 1_Active_Promoter | Active     | 407,060   | 2,668  | 93.68306471 |
| iPS (428C2) Ex1 | <i>DPH3</i>         | 1_Active_Promoter | Active     | 1_Active_Promoter | Active     | 988,540   | 11,697 | 91.9235817  |
| iPS (428C2) Ex1 | <i>ERCC3</i>        | 1_Active_Promoter | Active     | 1_Active_Promoter | Active     | 52,978    | 4,415  | 50.22924559 |
| iPS (428C2) Ex1 | <i>GAPDH</i>        | 1_Active_Promoter | Active     | 1_Active_Promoter | Active     | 1,443,698 | 7,936  | 91.15343089 |
| iPS (428C2) Ex1 | <i>KDM2B</i>        | 1_Active_Promoter | Active     | 1_Active_Promoter | Active     | 981,800   | 8,548  | 93.91033036 |
| iPS (428C2) Ex1 | <i>KIF2A</i>        | 1_Active_Promoter | Active     | 1_Active_Promoter | Active     | 408,700   | 9,235  | 88.27352846 |
| iPS (428C2) Ex1 | <i>LIG1</i>         | 1_Active_Promoter | Active     | 1_Active_Promoter | Active     | 371,520   | 4,442  | 91.87366854 |
| iPS (428C2) Ex1 | <i>METAP2</i>       | 1_Active_Promoter | Active     | 1_Active_Promoter | Active     | 283,780   | 5,325  | 89.41164618 |

|                 |               |                   |          |                   |          |           |        |             |
|-----------------|---------------|-------------------|----------|-------------------|----------|-----------|--------|-------------|
| iPS (428C2) Ex1 | <i>MITD1</i>  | 1_Active_Promoter | Active   | 1_Active_Promoter | Active   | 687,020   | 14,514 | 87.37478328 |
| iPS (428C2) Ex1 | <i>NCL</i>    | 1_Active_Promoter | Active   | 1_Active_Promoter | Active   | 703,380   | 10,592 | 88.46128149 |
| iPS (428C2) Ex1 | <i>STX5</i>   | 1_Active_Promoter | Active   | 1_Active_Promoter | Active   | 519,340   | 5,867  | 89.38964561 |
| iPS (428C2) Ex1 | <i>TAF2</i>   | 1_Active_Promoter | Active   | 1_Active_Promoter | Active   | 208,140   | 4,091  | 84.25149824 |
| iPS (428C2) Ex1 | <i>YBX1</i>   | 1_Active_Promoter | Active   | 1_Active_Promoter | Active   | 866,460   | 9,556  | 92.52965384 |
| iPS (428C2) Ex1 | <i>YTHDF2</i> | 1_Active_Promoter | Active   | 1_Active_Promoter | Active   | 597,560   | 8,882  | 90.18723854 |
| iPS (428C2) Ex1 | <i>ZZZ3</i>   | 1_Active_Promoter | Active   | 1_Active_Promoter | Active   | 660,780   | 13,377 | 87.46052606 |
| iPS (428C2) Ex1 | <i>TBX6</i>   | 1_Active_Promoter | Active   | 2_Weak_Promoter   | Active   | 234,553   | 7,161  | 84.56342552 |
| iPS (428C2) Ex1 | <i>FOXF1</i>  | 1_Active_Promoter | Active   | 3_Poised_Promoter | Bivalent | 93,857    | 3,727  | 61.73493896 |
| iPS (428C2) Ex1 | <i>KLF4</i>   | 1_Active_Promoter | Active   | 3_Poised_Promoter | Bivalent | 129,848   | 8,464  | 76.33821871 |
| iPS (428C2) Ex1 | <i>NR2F2</i>  | 1_Active_Promoter | Active   | 3_Poised_Promoter | Bivalent | 286,098   | 7,019  | 84.97990217 |
| iPS (428C2) Ex1 | <i>TCF21</i>  | 1_Active_Promoter | Active   | 3_Poised_Promoter | Bivalent | 917,824   | 15,154 | 92.46332951 |
| iPS (428C2) Ex1 | <i>TWIST1</i> | 1_Active_Promoter | Active   | 3_Poised_Promoter | Bivalent | 414,711   | 11,180 | 78.94532436 |
| iPS (428C2) Ex1 | <i>BCAT1</i>  | 1_Active_Promoter | Active   | 4_Strong_Enhancer | Other    | 602,460   | 7,454  | 90.73203983 |
| iPS (428C2) Ex1 | <i>DNMT3B</i> | 2_Weak_Promoter   | Active   | 1_Active_Promoter | Active   | 393,640   | 2,508  | 93.49487418 |
| iPS (428C2) Ex1 | <i>SNAI1</i>  | 2_Weak_Promoter   | Active   | 2_Weak_Promoter   | Active   | 1,403,105 | 8,735  | 96.17290203 |
| iPS (428C2) Ex1 | <i>GATA6</i>  | 2_Weak_Promoter   | Active   | 3_Poised_Promoter | Bivalent | 201,593   | 5,940  | 81.73037233 |
| iPS (428C2) Ex1 | <i>MESP1</i>  | 2_Weak_Promoter   | Active   | 3_Poised_Promoter | Bivalent | 1,341,623 | 9,570  | 94.14380294 |
| iPS (428C2) Ex1 | <i>SOX2</i>   | 3_Poised_Promoter | Bivalent | 1_Active_Promoter | Active   | 2,473,905 | 18,118 | 96.42876151 |
| iPS (428C2) Ex1 | <i>MIXL1</i>  | 3_Poised_Promoter | Bivalent | 2_Weak_Promoter   | Active   | 1,035,958 | 18,825 | 94.10900147 |
| iPS (428C2) Ex1 | <i>PODXL</i>  | 3_Poised_Promoter | Bivalent | 2_Weak_Promoter   | Active   | 880,860   | 9,519  | 92.65496029 |
| iPS (428C2) Ex1 | <i>PTPRZ1</i> | 3_Poised_Promoter | Bivalent | 2_Weak_Promoter   | Active   | 343,160   | 7,722  | 83.68010403 |

|                 |                     |                   |            |                   |            |           |        |             |
|-----------------|---------------------|-------------------|------------|-------------------|------------|-----------|--------|-------------|
| iPS (428C2) Ex1 | <i>COL2A1</i>       | 3_Poised_Promoter | Bivalent   | 3_Poised_Promoter | Bivalent   | 701,368   | 12,594 | 90.61996316 |
| iPS (428C2) Ex1 | <i>EOMES</i>        | 3_Poised_Promoter | Bivalent   | 3_Poised_Promoter | Bivalent   | 410,409   | 12,401 | 85.64463107 |
| iPS (428C2) Ex1 | <i>HOXA13</i>       | 3_Poised_Promoter | Bivalent   | 3_Poised_Promoter | Bivalent   | 2,435,683 | 11,567 | 96.11852984 |
| iPS (428C2) Ex1 | <i>NEUROD1</i>      | 3_Poised_Promoter | Bivalent   | 3_Poised_Promoter | Bivalent   | 966,017   | 20,327 | 87.96749093 |
| iPS (428C2) Ex1 | <i>NEUROG2</i>      | 3_Poised_Promoter | Bivalent   | 3_Poised_Promoter | Bivalent   | 1,127,126 | 19,151 | 92.77686271 |
| iPS (428C2) Ex1 | <i>SOX7</i>         | 3_Poised_Promoter | Bivalent   | 3_Poised_Promoter | Bivalent   | 285,626   | 8,168  | 84.97622788 |
| iPS (428C2) Ex1 | <i>PRSS3</i>        | 3_Poised_Promoter | Bivalent   | 12_Repressed      | Repressive | 214,920   | 4,451  | 85.84543578 |
| iPS (428C2) Ex1 | <i>ETS2</i>         | 4_Strong_Enhancer | Other      | 2_Weak_Promoter   | Active     | 8,026     | 1,322  | 62.48818302 |
| iPS (428C2) Ex1 | <i>Intergenic 3</i> | 7_Weak_Enhancer   | Other      | 5_Strong_Enhancer | Other      | 256,224   | 13,808 | 72.9674743  |
| iPS (428C2) Ex1 | <i>ANKRD1</i>       | 7_Weak_Enhancer   | Other      | 12_Repressed      | Repressive | 375,600   | 6,948  | 86.20454348 |
| iPS (428C2) Ex1 | <i>TREM1</i>        | 7_Weak_Enhancer   | Other      | 12_Repressed      | Repressive | 618,660   | 8,217  | 89.20564958 |
| iPS (428C2) Ex1 | <i>PRAME</i>        | 8_Insulator       | Other      | 8_Insulator       | Other      | 460,080   | 3,449  | 86.47361163 |
| iPS (428C2) Ex1 | <i>CBLN2</i>        | 8_Insulator       | Other      | 12_Repressed      | Repressive | 475,720   | 4,743  | 89.71909581 |
| iPS (428C2) Ex1 | <i>POU5F1</i>       | 11_Weak_Txn       | Other      | 2_Weak_Promoter   | Active     | 1,444,853 | 8,207  | 86.24603291 |
| iPS (428C2) Ex1 | <i>NANOG_P</i>      | 11_Weak_Txn       | Other      | 11_Weak_Txn       | Other      | 234,335   | 8,322  | 80.58409428 |
| iPS (428C2) Ex1 | <i>FGFR2</i>        | 12_Repressed      | Repressive | 1_Active_Promoter | Active     | 1,011,120 | 8,043  | 93.48738275 |
| iPS (428C2) Ex1 | <i>LIN28B</i>       | 12_Repressed      | Repressive | 1_Active_Promoter | Active     | 692,140   | 11,281 | 91.32120682 |
| iPS (428C2) Ex1 | <i>MYCN</i>         | 12_Repressed      | Repressive | 1_Active_Promoter | Active     | 405,080   | 12,519 | 83.7475332  |
| iPS (428C2) Ex1 | <i>SALL4</i>        | 12_Repressed      | Repressive | 1_Active_Promoter | Active     | 913,620   | 6,737  | 95.29130539 |
| iPS (428C2) Ex1 | <i>NANOG</i>        | 12_Repressed      | Repressive | 2_Weak_Promoter   | Active     | 101,789   | 5,741  | 70.14564293 |
| iPS (428C2) Ex1 | <i>ASCL1</i>        | 12_Repressed      | Repressive | 3_Poised_Promoter | Bivalent   | 157,442   | 5,278  | 80.51500313 |
| iPS (428C2) Ex1 | <i>ASCL2</i>        | 12_Repressed      | Repressive | 3_Poised_Promoter | Bivalent   | 401,762   | 9,010  | 84.62795634 |



|                 |                |                   |            |                   |            |           |        |             |
|-----------------|----------------|-------------------|------------|-------------------|------------|-----------|--------|-------------|
| iPS (428C2) Ex1 | <i>EVX1</i>    | 12_Repressed      | Repressive | 3_Poised_Promoter | Bivalent   | 36,211    | 3,803  | 52.03174169 |
| iPS (428C2) Ex1 | <i>FOXA2</i>   | 12_Repressed      | Repressive | 3_Poised_Promoter | Bivalent   | 63,113    | 4,621  | 69.37292639 |
| iPS (428C2) Ex1 | <i>GATA4</i>   | 12_Repressed      | Repressive | 3_Poised_Promoter | Bivalent   | 553,413   | 10,623 | 90.23418587 |
| iPS (428C2) Ex1 | <i>GATA5</i>   | 12_Repressed      | Repressive | 3_Poised_Promoter | Bivalent   | 700,007   | 7,017  | 89.42840757 |
| iPS (428C2) Ex1 | <i>GSC</i>     | 12_Repressed      | Repressive | 3_Poised_Promoter | Bivalent   | 431,808   | 8,288  | 90.85926023 |
| iPS (428C2) Ex1 | <i>LHX1</i>    | 12_Repressed      | Repressive | 3_Poised_Promoter | Bivalent   | 157,561   | 5,764  | 74.42893483 |
| iPS (428C2) Ex1 | <i>PAX3</i>    | 12_Repressed      | Repressive | 3_Poised_Promoter | Bivalent   | 21,899    | 3,013  | 60.92037689 |
| iPS (428C2) Ex1 | <i>PAX6</i>    | 12_Repressed      | Repressive | 3_Poised_Promoter | Bivalent   | 1,885,087 | 14,241 | 92.85751545 |
| iPS (428C2) Ex1 | <i>SOX1</i>    | 12_Repressed      | Repressive | 3_Poised_Promoter | Bivalent   | 1,335,342 | 7,627  | 91.04691417 |
| iPS (428C2) Ex1 | <i>SOX17</i>   | 12_Repressed      | Repressive | 3_Poised_Promoter | Bivalent   | 781,046   | 11,683 | 92.57381024 |
| iPS (428C2) Ex1 | <i>SST</i>     | 12_Repressed      | Repressive | 3_Poised_Promoter | Bivalent   | 619,379   | 12,666 | 88.52452142 |
| iPS (428C2) Ex1 | <i>T</i>       | 12_Repressed      | Repressive | 3_Poised_Promoter | Bivalent   | 149,138   | 10,811 | 70.31041682 |
| iPS (428C2) Ex1 | <i>ZIC1</i>    | 12_Repressed      | Repressive | 3_Poised_Promoter | Bivalent   | 50,003    | 5,037  | 60.00285898 |
| iPS (428C2) Ex1 | <i>COLQ</i>    | 12_Repressed      | Repressive | 7_Weak_Enhancer   | Other      | 518,140   | 8,451  | 87.62779702 |
| iPS (428C2) Ex1 | <i>DEFB132</i> | 12_Repressed      | Repressive | 12_Repressed      | Repressive | 48,820    | 2,252  | 73.03625868 |
| iPS (428C2) Ex1 | <i>GAST</i>    | 12_Repressed      | Repressive | 12_Repressed      | Repressive | 611,160   | 5,374  | 62.78917605 |
| iPS (428C2) Ex1 | <i>HEMGN</i>   | 12_Repressed      | Repressive | 12_Repressed      | Repressive | 476,400   | 6,325  | 91.22903175 |
| iPS (428C2) Ex1 | <i>SLC34A1</i> | 12_Repressed      | Repressive | 12_Repressed      | Repressive | 904,600   | 7,153  | 67.41625983 |
| iPS (428C2) Ex1 | <i>TNFSF8</i>  | 12_Repressed      | Repressive | 12_Repressed      | Repressive | 350,560   | 4,199  | 86.55947227 |
| iPS (428C2) Ex1 | <i>VPREB1</i>  | 12_Repressed      | Repressive | 12_Repressed      | Repressive | 280,000   | 2,635  | 91.4771741  |
| iPS (428C2) Ex1 | <i>DPPA4</i>   | 13_Heterochrom/lo | Repressive | 1_Active_Promoter | Active     | 1,029,523 | 19,517 | 89.9139881  |
| iPS (428C2) Ex1 | <i>ZFP42</i>   | 13_Heterochrom/lo | Repressive | 1_Active_Promoter | Active     | 646,220   | 7,799  | 89.93519223 |

|                 |                     |                   |            |                   |            |           |        |             |
|-----------------|---------------------|-------------------|------------|-------------------|------------|-----------|--------|-------------|
| iPS (428C2) Ex1 | <i>Intergenic 1</i> | 13_Heterochrom/lo | Repressive | 4_Strong_Enhancer | Other      | 1,199,038 | 16,568 | 89.72553777 |
| iPS (428C2) Ex1 | <i>Intergenic 2</i> | 13_Heterochrom/lo | Repressive | 5_Strong_Enhancer | Other      | 1,603,505 | 13,197 | 94.11169033 |
| iPS (428C2) Ex1 | <i>Intergenic 4</i> | 13_Heterochrom/lo | Repressive | 5_Strong_Enhancer | Other      | 1,727,815 | 10,231 | 94.93365501 |
| iPS (428C2) Ex1 | <i>Intergenic 5</i> | 13_Heterochrom/lo | Repressive | 5_Strong_Enhancer | Other      | 1,002,928 | 19,607 | 87.62121822 |
| iPS (428C2) Ex1 | <i>NEUROD4</i>      | 13_Heterochrom/lo | Repressive | 6_Weak_Enhancer   | Other      | 619,821   | 11,012 | 90.29930299 |
| iPS (428C2) Ex1 | <i>ARHGEF38</i>     | 13_Heterochrom/lo | Repressive | 12_Repressed      | Repressive | 358,020   | 7,241  | 81.69551188 |
| iPS (428C2) Ex1 | <i>FLRT1</i>        | 13_Heterochrom/lo | Repressive | 12_Repressed      | Repressive | 709,680   | 6,646  | 89.40847268 |
| iPS (428C2) Ex1 | <i>GIMAP1</i>       | 13_Heterochrom/lo | Repressive | 12_Repressed      | Repressive | 460,440   | 6,274  | 88.28413025 |
| iPS (428C2) Ex1 | <i>IGLL5</i>        | 13_Heterochrom/lo | Repressive | 12_Repressed      | Repressive | 457,580   | 2,985  | 90.40797165 |
| iPS (428C2) Ex1 | <i>KRTAP5-11</i>    | 13_Heterochrom/lo | Repressive | 12_Repressed      | Repressive | 167,840   | 4,653  | 82.38897939 |
| iPS (428C2) Ex1 | <i>MC3R</i>         | 13_Heterochrom/lo | Repressive | 12_Repressed      | Repressive | 214,160   | 3,995  | 89.39560071 |
| iPS (428C2) Ex1 | <i>OBP2B</i>        | 13_Heterochrom/lo | Repressive | 12_Repressed      | Repressive | 321,060   | 3,775  | 60.68448888 |
| iPS (428C2) Ex1 | <i>HNF4A</i>        | 13_Heterochrom/lo | Repressive | 13_Heterochrom/lo | Repressive | 179,649   | 6,894  | 81.07631334 |
| iPS (428C2) Ex1 | <i>SOX6</i>         | 13_Heterochrom/lo | Repressive | 13_Heterochrom/lo | Repressive | 540,320   | 7,667  | 90.08977251 |
| iPS (428C2) Ex1 | <i>NKX2-5</i>       | 14_Repetitive/CNV | Other      | 3_Poised_Promoter | Bivalent   | 1,085,549 | 12,418 | 90.22152152 |
| iPS (428C2) Ex2 | <i>ACO2</i>         | 1_Active_Promoter | Active     | 1_Active_Promoter | Active     | 492,080   | 3,106  | 92.68045236 |
| iPS (428C2) Ex2 | <i>DPH3</i>         | 1_Active_Promoter | Active     | 1_Active_Promoter | Active     | 909,520   | 13,251 | 90.1747557  |
| iPS (428C2) Ex2 | <i>ERCC3</i>        | 1_Active_Promoter | Active     | 1_Active_Promoter | Active     | 67,937    | 4,074  | 64.70364018 |
| iPS (428C2) Ex2 | <i>GAPDH</i>        | 1_Active_Promoter | Active     | 1_Active_Promoter | Active     | 1,517,433 | 8,089  | 91.14879712 |
| iPS (428C2) Ex2 | <i>KDM2B</i>        | 1_Active_Promoter | Active     | 1_Active_Promoter | Active     | 1,236,400 | 8,634  | 94.57564737 |
| iPS (428C2) Ex2 | <i>KIF2A</i>        | 1_Active_Promoter | Active     | 1_Active_Promoter | Active     | 405,960   | 10,324 | 86.30230886 |
| iPS (428C2) Ex2 | <i>LIG1</i>         | 1_Active_Promoter | Active     | 1_Active_Promoter | Active     | 383,000   | 4,615  | 93.15892529 |

|                 |               |                   |          |                   |          |           |        |             |
|-----------------|---------------|-------------------|----------|-------------------|----------|-----------|--------|-------------|
| iPS (428C2) Ex2 | <i>METAP2</i> | 1_Active_Promoter | Active   | 1_Active_Promoter | Active   | 430,460   | 6,572  | 88.35233384 |
| iPS (428C2) Ex2 | <i>MITD1</i>  | 1_Active_Promoter | Active   | 1_Active_Promoter | Active   | 859,880   | 15,692 | 87.86311004 |
| iPS (428C2) Ex2 | <i>NCL</i>    | 1_Active_Promoter | Active   | 1_Active_Promoter | Active   | 960,560   | 11,191 | 91.07629705 |
| iPS (428C2) Ex2 | <i>STX5</i>   | 1_Active_Promoter | Active   | 1_Active_Promoter | Active   | 522,620   | 5,693  | 87.71551392 |
| iPS (428C2) Ex2 | <i>TAF2</i>   | 1_Active_Promoter | Active   | 1_Active_Promoter | Active   | 252,040   | 4,865  | 82.75779948 |
| iPS (428C2) Ex2 | <i>YBX1</i>   | 1_Active_Promoter | Active   | 1_Active_Promoter | Active   | 1,074,520 | 10,206 | 92.43225619 |
| iPS (428C2) Ex2 | <i>YTHDF2</i> | 1_Active_Promoter | Active   | 1_Active_Promoter | Active   | 698,220   | 9,072  | 87.21567421 |
| iPS (428C2) Ex2 | <i>ZZZ3</i>   | 1_Active_Promoter | Active   | 1_Active_Promoter | Active   | 890,000   | 14,597 | 89.89130769 |
| iPS (428C2) Ex2 | <i>TBX6</i>   | 1_Active_Promoter | Active   | 2_Weak_Promoter   | Active   | 387,580   | 7,620  | 89.88711028 |
| iPS (428C2) Ex2 | <i>FOXF1</i>  | 1_Active_Promoter | Active   | 3_Poised_Promoter | Bivalent | 199,418   | 4,412  | 71.18540151 |
| iPS (428C2) Ex2 | <i>KLF4</i>   | 1_Active_Promoter | Active   | 3_Poised_Promoter | Bivalent | 224,016   | 8,726  | 78.95689312 |
| iPS (428C2) Ex2 | <i>NR2F2</i>  | 1_Active_Promoter | Active   | 3_Poised_Promoter | Bivalent | 367,133   | 7,042  | 84.4172191  |
| iPS (428C2) Ex2 | <i>TCF21</i>  | 1_Active_Promoter | Active   | 3_Poised_Promoter | Bivalent | 1,326,190 | 15,685 | 92.29347973 |
| iPS (428C2) Ex2 | <i>TWIST1</i> | 1_Active_Promoter | Active   | 3_Poised_Promoter | Bivalent | 697,331   | 11,726 | 87.02363724 |
| iPS (428C2) Ex2 | <i>BCAT1</i>  | 1_Active_Promoter | Active   | 4_Strong_Enhancer | Other    | 776,720   | 8,611  | 91.90066063 |
| iPS (428C2) Ex2 | <i>DNMT3B</i> | 2_Weak_Promoter   | Active   | 1_Active_Promoter | Active   | 511,980   | 2,969  | 93.08377226 |
| iPS (428C2) Ex2 | <i>SNAI1</i>  | 2_Weak_Promoter   | Active   | 2_Weak_Promoter   | Active   | 1,503,192 | 8,919  | 95.90425704 |
| iPS (428C2) Ex2 | <i>GATA6</i>  | 2_Weak_Promoter   | Active   | 3_Poised_Promoter | Bivalent | 415,434   | 6,434  | 83.78586032 |
| iPS (428C2) Ex2 | <i>MESP1</i>  | 2_Weak_Promoter   | Active   | 3_Poised_Promoter | Bivalent | 1,409,329 | 9,464  | 93.24781019 |
| iPS (428C2) Ex2 | <i>SOX2</i>   | 3_Poised_Promoter | Bivalent | 1_Active_Promoter | Active   | 3,384,289 | 18,210 | 97.7786369  |
| iPS (428C2) Ex2 | <i>MIXL1</i>  | 3_Poised_Promoter | Bivalent | 2_Weak_Promoter   | Active   | 1,441,188 | 19,017 | 93.00448957 |
| iPS (428C2) Ex2 | <i>PODXL</i>  | 3_Poised_Promoter | Bivalent | 2_Weak_Promoter   | Active   | 982,540   | 10,538 | 93.20220048 |

|                 |                     |                   |            |                   |            |           |        |             |
|-----------------|---------------------|-------------------|------------|-------------------|------------|-----------|--------|-------------|
| iPS (428C2) Ex2 | <i>PTPRZ1</i>       | 3_Poised_Promoter | Bivalent   | 2_Weak_Promoter   | Active     | 393,120   | 9,015  | 85.27967761 |
| iPS (428C2) Ex2 | <i>COL2A1</i>       | 3_Poised_Promoter | Bivalent   | 3_Poised_Promoter | Bivalent   | 1,152,938 | 13,225 | 92.17633734 |
| iPS (428C2) Ex2 | <i>EOMES</i>        | 3_Poised_Promoter | Bivalent   | 3_Poised_Promoter | Bivalent   | 708,450   | 12,938 | 88.79768294 |
| iPS (428C2) Ex2 | <i>HOXA13</i>       | 3_Poised_Promoter | Bivalent   | 3_Poised_Promoter | Bivalent   | 2,518,859 | 12,096 | 95.27260125 |
| iPS (428C2) Ex2 | <i>NEUROD1</i>      | 3_Poised_Promoter | Bivalent   | 3_Poised_Promoter | Bivalent   | 1,617,898 | 20,637 | 92.47666462 |
| iPS (428C2) Ex2 | <i>NEUROG2</i>      | 3_Poised_Promoter | Bivalent   | 3_Poised_Promoter | Bivalent   | 1,566,173 | 19,374 | 94.21181368 |
| iPS (428C2) Ex2 | <i>SOX7</i>         | 3_Poised_Promoter | Bivalent   | 3_Poised_Promoter | Bivalent   | 404,842   | 8,133  | 88.99320487 |
| iPS (428C2) Ex2 | <i>PRSS3</i>        | 3_Poised_Promoter | Bivalent   | 12_Repressed      | Repressive | 204,220   | 5,610  | 85.26742967 |
| iPS (428C2) Ex2 | <i>ETS2</i>         | 4_Strong_Enhancer | Other      | 2_Weak_Promoter   | Active     | 19,103    | 1,673  | 69.38741653 |
| iPS (428C2) Ex2 | <i>Intergenic 3</i> | 7_Weak_Enhancer   | Other      | 5_Strong_Enhancer | Other      | 523,746   | 15,420 | 81.60154948 |
| iPS (428C2) Ex2 | <i>ANKRD1</i>       | 7_Weak_Enhancer   | Other      | 12_Repressed      | Repressive | 307,540   | 7,903  | 83.28942099 |
| iPS (428C2) Ex2 | <i>TREM1</i>        | 7_Weak_Enhancer   | Other      | 12_Repressed      | Repressive | 517,820   | 9,094  | 88.40799502 |
| iPS (428C2) Ex2 | <i>PRAME</i>        | 8_Insulator       | Other      | 8_Insulator       | Other      | 429,160   | 3,754  | 92.26080759 |
| iPS (428C2) Ex2 | <i>CBLN2</i>        | 8_Insulator       | Other      | 12_Repressed      | Repressive | 422,780   | 5,541  | 90.8390439  |
| iPS (428C2) Ex2 | <i>POU5F1</i>       | 11_Weak_Txn       | Other      | 2_Weak_Promoter   | Active     | 2,366,942 | 8,543  | 91.90962883 |
| iPS (428C2) Ex2 | <i>NANOG_P</i>      | 11_Weak_Txn       | Other      | 11_Weak_Txn       | Other      | 383,284   | 8,782  | 77.65015871 |
| iPS (428C2) Ex2 | <i>FGFR2</i>        | 12_Repressed      | Repressive | 1_Active_Promoter | Active     | 1,044,160 | 8,635  | 92.16663642 |
| iPS (428C2) Ex2 | <i>LIN28B</i>       | 12_Repressed      | Repressive | 1_Active_Promoter | Active     | 983,820   | 12,913 | 92.75647564 |
| iPS (428C2) Ex2 | <i>MYCN</i>         | 12_Repressed      | Repressive | 1_Active_Promoter | Active     | 516,320   | 13,498 | 84.81999786 |
| iPS (428C2) Ex2 | <i>SALL4</i>        | 12_Repressed      | Repressive | 1_Active_Promoter | Active     | 1,040,160 | 7,195  | 94.84701881 |
| iPS (428C2) Ex2 | <i>NANOG</i>        | 12_Repressed      | Repressive | 2_Weak_Promoter   | Active     | 168,906   | 5,962  | 78.47937975 |
| iPS (428C2) Ex2 | <i>ASCL1</i>        | 12_Repressed      | Repressive | 3_Poised_Promoter | Bivalent   | 265,447   | 5,525  | 82.15246903 |

|                 |                |                   |            |                   |            |           |        |             |
|-----------------|----------------|-------------------|------------|-------------------|------------|-----------|--------|-------------|
| iPS (428C2) Ex2 | <i>ASCL2</i>   | 12_Repressed      | Repressive | 3_Poised_Promoter | Bivalent   | 800,009   | 9,825  | 88.23608654 |
| iPS (428C2) Ex2 | <i>EVX1</i>    | 12_Repressed      | Repressive | 3_Poised_Promoter | Bivalent   | 75,273    | 4,877  | 64.4194064  |
| iPS (428C2) Ex2 | <i>FOXA2</i>   | 12_Repressed      | Repressive | 3_Poised_Promoter | Bivalent   | 151,812   | 5,503  | 73.48895596 |
| iPS (428C2) Ex2 | <i>GATA4</i>   | 12_Repressed      | Repressive | 3_Poised_Promoter | Bivalent   | 825,219   | 11,188 | 90.27895455 |
| iPS (428C2) Ex2 | <i>GATA5</i>   | 12_Repressed      | Repressive | 3_Poised_Promoter | Bivalent   | 1,344,116 | 7,239  | 93.37873921 |
| iPS (428C2) Ex2 | <i>GSC</i>     | 12_Repressed      | Repressive | 3_Poised_Promoter | Bivalent   | 982,463   | 9,042  | 91.17584778 |
| iPS (428C2) Ex2 | <i>LHX1</i>    | 12_Repressed      | Repressive | 3_Poised_Promoter | Bivalent   | 383,709   | 6,704  | 80.36153099 |
| iPS (428C2) Ex2 | <i>PAX3</i>    | 12_Repressed      | Repressive | 3_Poised_Promoter | Bivalent   | 39,749    | 3,732  | 60.76889258 |
| iPS (428C2) Ex2 | <i>PAX6</i>    | 12_Repressed      | Repressive | 3_Poised_Promoter | Bivalent   | 2,334,526 | 13,903 | 94.46192104 |
| iPS (428C2) Ex2 | <i>SOX1</i>    | 12_Repressed      | Repressive | 3_Poised_Promoter | Bivalent   | 2,227,927 | 8,065  | 93.99547796 |
| iPS (428C2) Ex2 | <i>SOX17</i>   | 12_Repressed      | Repressive | 3_Poised_Promoter | Bivalent   | 953,165   | 11,730 | 91.29257207 |
| iPS (428C2) Ex2 | <i>SST</i>     | 12_Repressed      | Repressive | 3_Poised_Promoter | Bivalent   | 1,130,128 | 13,361 | 91.3810084  |
| iPS (428C2) Ex2 | <i>T</i>       | 12_Repressed      | Repressive | 3_Poised_Promoter | Bivalent   | 285,738   | 11,840 | 79.05296682 |
| iPS (428C2) Ex2 | <i>ZIC1</i>    | 12_Repressed      | Repressive | 3_Poised_Promoter | Bivalent   | 65,987    | 5,197  | 58.149553   |
| iPS (428C2) Ex2 | <i>COLQ</i>    | 12_Repressed      | Repressive | 7_Weak_Enhancer   | Other      | 455,040   | 9,978  | 87.71097046 |
| iPS (428C2) Ex2 | <i>DEFB132</i> | 12_Repressed      | Repressive | 12_Repressed      | Repressive | 47,760    | 2,646  | 74.985122   |
| iPS (428C2) Ex2 | <i>GAST</i>    | 12_Repressed      | Repressive | 12_Repressed      | Repressive | 566,580   | 5,768  | 90.6476403  |
| iPS (428C2) Ex2 | <i>HEMGN</i>   | 12_Repressed      | Repressive | 12_Repressed      | Repressive | 364,500   | 7,519  | 88.02903471 |
| iPS (428C2) Ex2 | <i>SLC34A1</i> | 12_Repressed      | Repressive | 12_Repressed      | Repressive | 798,180   | 6,931  | 90.18750569 |
| iPS (428C2) Ex2 | <i>TNFSF8</i>  | 12_Repressed      | Repressive | 12_Repressed      | Repressive | 285,540   | 4,936  | 83.95414498 |
| iPS (428C2) Ex2 | <i>VPREB1</i>  | 12_Repressed      | Repressive | 12_Repressed      | Repressive | 300,200   | 3,069  | 4.456583881 |
| iPS (428C2) Ex2 | <i>DPPA4</i>   | 13_Heterochrom/lo | Repressive | 1_Active_Promoter | Active     | 1,477,838 | 19,689 | 92.34340923 |

|                 |                     |                   |            |                   |            |                |        |             |
|-----------------|---------------------|-------------------|------------|-------------------|------------|----------------|--------|-------------|
| iPS (428C2) Ex2 | <i>ZFP42</i>        | 13_Heterochrom/lo | Repressive | 1_Active_Promoter | Active     | 665,900        | 8,303  | 86.90327915 |
| iPS (428C2) Ex2 | <i>Intergenic 1</i> | 13_Heterochrom/lo | Repressive | 4_Strong_Enhancer | Other      | 1,841,248      | 17,539 | 91.94468326 |
| iPS (428C2) Ex2 | <i>Intergenic 2</i> | 13_Heterochrom/lo | Repressive | 5_Strong_Enhancer | Other      | 2,603,335      | 13,383 | 95.30693633 |
| iPS (428C2) Ex2 | <i>Intergenic 4</i> | 13_Heterochrom/lo | Repressive | 5_Strong_Enhancer | Other      | 1,909,362      | 10,536 | 94.07562838 |
| iPS (428C2) Ex2 | <i>Intergenic 5</i> | 13_Heterochrom/lo | Repressive | 5_Strong_Enhancer | Other      | 1,606,334      | 19,651 | 91.04429207 |
| iPS (428C2) Ex2 | <i>NEUROD4</i>      | 13_Heterochrom/lo | Repressive | 6_Weak_Enhancer   | Other      | 1,214,590      | 12,182 | 91.37413741 |
| iPS (428C2) Ex2 | <i>ARHGEF38</i>     | 13_Heterochrom/lo | Repressive | 12_Repressed      | Repressive | 348,680        | 8,523  | 89.85198617 |
| iPS (428C2) Ex2 | <i>FLRT1</i>        | 13_Heterochrom/lo | Repressive | 12_Repressed      | Repressive | 640,540        | 7,305  | 90.3703887  |
| iPS (428C2) Ex2 | <i>GIMAP1</i>       | 13_Heterochrom/lo | Repressive | 12_Repressed      | Repressive | 376,160        | 7,052  | 88.88552774 |
| iPS (428C2) Ex2 | <i>IGLL5</i>        | 13_Heterochrom/lo | Repressive | 12_Repressed      | Repressive | 472,440        | 3,263  | 94.17842815 |
| iPS (428C2) Ex2 | <i>KRTAP5-11</i>    | 13_Heterochrom/lo | Repressive | 12_Repressed      | Repressive | 154,160        | 5,178  | 79.36726905 |
| iPS (428C2) Ex2 | <i>MC3R</i>         | 13_Heterochrom/lo | Repressive | 12_Repressed      | Repressive | 190,100        | 4,213  | 84.56273459 |
| iPS (428C2) Ex2 | <i>OBP2B</i>        | 13_Heterochrom/lo | Repressive | 12_Repressed      | Repressive | 248,620        | 3,989  | 88.35581545 |
| iPS (428C2) Ex2 | <i>HNF4A</i>        | 13_Heterochrom/lo | Repressive | 13_Heterochrom/lo | Repressive | 242,056        | 6,923  | 80.94709149 |
| iPS (428C2) Ex2 | <i>SOX6</i>         | 13_Heterochrom/lo | Repressive | 13_Heterochrom/lo | Repressive | 477,040        | 8,759  | 89.43504498 |
| iPS (428C2) Ex2 | <i>NKX2-5</i>       | 14_Repetitive/CNV | Other      | 3_Poised_Promoter | Bivalent   | 1,709,065      | 12,395 | 91.44024846 |
| EED-sh1         | <i>TWIST1</i>       | 1_Active_Promoter | Active     | 3_Poised_Promoter | Bivalent   | <i>370,004</i> | 5,250  | 88.07690372 |
| EED-sh1         | <i>HOXA13</i>       | 3_Poised_Promoter | Bivalent   | 3_Poised_Promoter | Bivalent   | <i>482,561</i> | 5,499  | 85.2835807  |
| EED-sh1         | <i>NEUROD1</i>      | 3_Poised_Promoter | Bivalent   | 3_Poised_Promoter | Bivalent   | <i>616,371</i> | 10,549 | 86.19168233 |
| EED-sh1         | <i>NEUROG2</i>      | 3_Poised_Promoter | Bivalent   | 3_Poised_Promoter | Bivalent   | <i>595,542</i> | 9,862  | 88.75569235 |
| EED-sh1         | <i>GSC</i>          | 12_Repressed      | Repressive | 3_Poised_Promoter | Bivalent   | <i>342,858</i> | 5,185  | 85.72373316 |
| EED-sh1         | <i>PAX6</i>         | 12_Repressed      | Repressive | 3_Poised_Promoter | Bivalent   | <i>670,882</i> | 7,671  | 86.77307331 |

|            |                |                   |            |                   |          |         |        |             |
|------------|----------------|-------------------|------------|-------------------|----------|---------|--------|-------------|
| EED-sh1    | <i>SOX17</i>   | 12_Repressed      | Repressive | 3_Poised_Promoter | Bivalent | 807,112 | 5,465  | 92.19738507 |
| EED-sh1    | <i>NKX2-5</i>  | 14_Repetitive/CNV | Other      | 3_Poised_Promoter | Bivalent | 663,297 | 7,512  | 88.07494343 |
| EED-sh2    | <i>TWIST1</i>  | 1_Active_Promoter | Active     | 3_Poised_Promoter | Bivalent | 217,670 | 6,680  | 85.45040551 |
| EED-sh2    | <i>HOXA13</i>  | 3_Poised_Promoter | Bivalent   | 3_Poised_Promoter | Bivalent | 289,058 | 6,951  | 81.07729812 |
| EED-sh2    | <i>NEUROD1</i> | 3_Poised_Promoter | Bivalent   | 3_Poised_Promoter | Bivalent | 569,455 | 14,162 | 88.89976962 |
| EED-sh2    | <i>NEUROG2</i> | 3_Poised_Promoter | Bivalent   | 3_Poised_Promoter | Bivalent | 651,423 | 14,499 | 90.36403637 |
| EED-sh2    | <i>GSC</i>     | 12_Repressed      | Repressive | 3_Poised_Promoter | Bivalent | 500,495 | 7,190  | 88.21220003 |
| EED-sh2    | <i>PAX6</i>    | 12_Repressed      | Repressive | 3_Poised_Promoter | Bivalent | 494,706 | 9,701  | 84.6709085  |
| EED-sh2    | <i>SOX17</i>   | 12_Repressed      | Repressive | 3_Poised_Promoter | Bivalent | 825,543 | 8,293  | 94.90404312 |
| EED-sh2    | <i>NKX2-5</i>  | 14_Repetitive/CNV | Other      | 3_Poised_Promoter | Bivalent | 461,339 | 9,717  | 88.90373108 |
| RING1B-sh1 | <i>TWIST1</i>  | 1_Active_Promoter | Active     | 3_Poised_Promoter | Bivalent | 422,626 | 7,461  | 90.1304663  |
| RING1B-sh1 | <i>HOXA13</i>  | 3_Poised_Promoter | Bivalent   | 3_Poised_Promoter | Bivalent | 384,041 | 7,983  | 87.80536093 |
| RING1B-sh1 | <i>NEUROD1</i> | 3_Poised_Promoter | Bivalent   | 3_Poised_Promoter | Bivalent | 632,045 | 13,467 | 90.43231846 |
| RING1B-sh1 | <i>NEUROG2</i> | 3_Poised_Promoter | Bivalent   | 3_Poised_Promoter | Bivalent | 716,996 | 14,421 | 93.31987343 |
| RING1B-sh1 | <i>GSC</i>     | 12_Repressed      | Repressive | 3_Poised_Promoter | Bivalent | 468,919 | 6,930  | 92.66688062 |
| RING1B-sh1 | <i>PAX6</i>    | 12_Repressed      | Repressive | 3_Poised_Promoter | Bivalent | 729,006 | 10,054 | 91.5348058  |
| RING1B-sh1 | <i>SOX17</i>   | 12_Repressed      | Repressive | 3_Poised_Promoter | Bivalent | 906,769 | 8,110  | 95.49602591 |
| RING1B-sh1 | <i>NKX2-5</i>  | 14_Repetitive/CNV | Other      | 3_Poised_Promoter | Bivalent | 600,484 | 10,074 | 91.09899352 |
| RING1B-sh2 | <i>TWIST1</i>  | 1_Active_Promoter | Active     | 3_Poised_Promoter | Bivalent | 563,682 | 6,660  | 89.76830074 |
| RING1B-sh2 | <i>HOXA13</i>  | 3_Poised_Promoter | Bivalent   | 3_Poised_Promoter | Bivalent | 734,762 | 7,010  | 93.23048278 |
| RING1B-sh2 | <i>NEUROD1</i> | 3_Poised_Promoter | Bivalent   | 3_Poised_Promoter | Bivalent | 901,090 | 12,289 | 93.56916611 |
| RING1B-sh2 | <i>NEUROG2</i> | 3_Poised_Promoter | Bivalent   | 3_Poised_Promoter | Bivalent | 967,034 | 12,613 | 93.6064418  |

|            |                |                   |            |                   |          |           |        |             |
|------------|----------------|-------------------|------------|-------------------|----------|-----------|--------|-------------|
| RING1B-sh2 | <i>GSC</i>     | 12_Repressed      | Repressive | 3_Poised_Promoter | Bivalent | 625,269   | 6,294  | 93.61752763 |
| RING1B-sh2 | <i>PAX6</i>    | 12_Repressed      | Repressive | 3_Poised_Promoter | Bivalent | 1,001,566 | 9,316  | 91.37723024 |
| RING1B-sh2 | <i>SOX17</i>   | 12_Repressed      | Repressive | 3_Poised_Promoter | Bivalent | 1,074,198 | 7,597  | 94.23570711 |
| RING1B-sh2 | <i>NKX2-5</i>  | 14_Repetitive/CNV | Other      | 3_Poised_Promoter | Bivalent | 951,039   | 8,849  | 94.0952543  |
| shNega     | <i>TWIST1</i>  | 1_Active_Promoter | Active     | 3_Poised_Promoter | Bivalent | 589,571   | 7,465  | 90.71135198 |
| shNega     | <i>HOXA13</i>  | 3_Poised_Promoter | Bivalent   | 3_Poised_Promoter | Bivalent | 503,685   | 7,668  | 91.56367544 |
| shNega     | <i>NEUROD1</i> | 3_Poised_Promoter | Bivalent   | 3_Poised_Promoter | Bivalent | 726,236   | 13,549 | 91.2716323  |
| shNega     | <i>NEUROG2</i> | 3_Poised_Promoter | Bivalent   | 3_Poised_Promoter | Bivalent | 723,357   | 13,004 | 91.86989572 |
| shNega     | <i>GSC</i>     | 12_Repressed      | Repressive | 3_Poised_Promoter | Bivalent | 316,160   | 6,272  | 85.20002717 |
| shNega     | <i>PAX6</i>    | 12_Repressed      | Repressive | 3_Poised_Promoter | Bivalent | 658,380   | 9,198  | 87.70942795 |
| shNega     | <i>SOX17</i>   | 12_Repressed      | Repressive | 3_Poised_Promoter | Bivalent | 875,539   | 7,702  | 92.33904808 |
| shNega     | <i>NKX2-5</i>  | 14_Repetitive/CNV | Other      | 3_Poised_Promoter | Bivalent | 363,205   | 8,398  | 83.50651804 |
| WDR5-sh1   | <i>TWIST1</i>  | 1_Active_Promoter | Active     | 3_Poised_Promoter | Bivalent | 260,357   | 6,099  | 83.87194367 |
| WDR5-sh1   | <i>HOXA13</i>  | 3_Poised_Promoter | Bivalent   | 3_Poised_Promoter | Bivalent | 298,018   | 6,852  | 87.10021864 |
| WDR5-sh1   | <i>NEUROD1</i> | 3_Poised_Promoter | Bivalent   | 3_Poised_Promoter | Bivalent | 438,847   | 11,259 | 87.61322252 |
| WDR5-sh1   | <i>NEUROG2</i> | 3_Poised_Promoter | Bivalent   | 3_Poised_Promoter | Bivalent | 405,701   | 11,857 | 90.62421181 |
| WDR5-sh1   | <i>GSC</i>     | 12_Repressed      | Repressive | 3_Poised_Promoter | Bivalent | 257,122   | 5,407  | 89.18027379 |
| WDR5-sh1   | <i>PAX6</i>    | 12_Repressed      | Repressive | 3_Poised_Promoter | Bivalent | 482,738   | 8,499  | 87.89947254 |
| WDR5-sh1   | <i>SOX17</i>   | 12_Repressed      | Repressive | 3_Poised_Promoter | Bivalent | 636,918   | 6,578  | 94.13279908 |
| WDR5-sh1   | <i>NKX2-5</i>  | 14_Repetitive/CNV | Other      | 3_Poised_Promoter | Bivalent | 445,222   | 8,690  | 89.49720901 |
| WDR5-sh2   | <i>TWIST1</i>  | 1_Active_Promoter | Active     | 3_Poised_Promoter | Bivalent | 548,015   | 6,072  | 92.12422813 |
| WDR5-sh2   | <i>HOXA13</i>  | 3_Poised_Promoter | Bivalent   | 3_Poised_Promoter | Bivalent | 490,114   | 6,606  | 89.50613102 |



|          |                |                   |            |                   |          |         |        |             |
|----------|----------------|-------------------|------------|-------------------|----------|---------|--------|-------------|
| WDR5-sh2 | <i>NEUROD1</i> | 3_Poised_Promoter | Bivalent   | 3_Poised_Promoter | Bivalent | 603,793 | 10,878 | 90.94101124 |
| WDR5-sh2 | <i>NEUROG2</i> | 3_Poised_Promoter | Bivalent   | 3_Poised_Promoter | Bivalent | 709,042 | 11,615 | 94.49004661 |
| WDR5-sh2 | <i>GSC</i>     | 12_Repressed      | Repressive | 3_Poised_Promoter | Bivalent | 370,659 | 5,530  | 91.20746813 |
| WDR5-sh2 | <i>PAX6</i>    | 12_Repressed      | Repressive | 3_Poised_Promoter | Bivalent | 774,845 | 8,339  | 90.88035921 |
| WDR5-sh2 | <i>SOX17</i>   | 12_Repressed      | Repressive | 3_Poised_Promoter | Bivalent | 853,763 | 6,267  | 91.86051625 |
| WDR5-sh2 | <i>NKX2-5</i>  | 14_Repetitive/CNV | Other      | 3_Poised_Promoter | Bivalent | 904,421 | 8,730  | 94.56034315 |

**Supplementary Table 3. Sequenced read number and cis read ratio in each bait after removing PCR duplicates**

| Samples (cell type) | Bait          | Total read # | Cis-chromosomal interaction # | Trans-chromosomal interaction# | Cis-chromosomal read % among total read |
|---------------------|---------------|--------------|-------------------------------|--------------------------------|-----------------------------------------|
| HF (TIG120) Ex1     | <i>ASCL1</i>  | 61,965       | 17,423                        | 44,542                         | 28.11                                   |
| HF (TIG120) Ex1     | <i>ASCL2</i>  | 76,646       | 32,382                        | 44,264                         | 42.24                                   |
| HF (TIG120) Ex1     | <i>COL2A1</i> | 108,383      | 52,818                        | 55,565                         | 48.73                                   |
| HF (TIG120) Ex1     | <i>DPPA4</i>  | 88,020       | 45,751                        | 42,269                         | 51.97                                   |
| HF (TIG120) Ex1     | <i>EOMES</i>  | 109,804      | 60,007                        | 49,797                         | 54.64                                   |
| HF (TIG120) Ex1     | <i>ERCC3</i>  | 22,107       | 10,730                        | 11,377                         | 48.53                                   |
| HF (TIG120) Ex1     | <i>ETS2</i>   | 10,239       | 4,311                         | 5,928                          | 42.1                                    |
| HF (TIG120) Ex1     | <i>EVX1</i>   | 23,605       | 12,524                        | 11,081                         | 53.05                                   |
| HF (TIG120) Ex1     | <i>FOXA2</i>  | 30,789       | 9,905                         | 20,884                         | 32.17                                   |
| HF (TIG120) Ex1     | <i>FOXF1</i>  | 47,405       | 19,193                        | 28,212                         | 40.48                                   |
| HF (TIG120) Ex1     | <i>GAPDH</i>  | 94,681       | 42,361                        | 52,320                         | 44.74                                   |
| HF (TIG120) Ex1     | <i>GATA4</i>  | 78,789       | 35,277                        | 43,512                         | 44.77                                   |
| HF (TIG120) Ex1     | <i>GATA5</i>  | 102,410      | 37,961                        | 64,449                         | 37.06                                   |
| HF (TIG120) Ex1     | <i>GATA6</i>  | 52,742       | 24,273                        | 28,469                         | 46.02                                   |
| HF (TIG120) Ex1     | <i>GSC</i>    | 81,673       | 34,727                        | 46,946                         | 42.51                                   |
| HF (TIG120) Ex1     | <i>HNF4A</i>  | 50,136       | 19,730                        | 30,406                         | 39.35                                   |
| HF (TIG120) Ex1     | <i>HOXA13</i> | 119,539      | 74,858                        | 44,681                         | 62.62                                   |
| HF (TIG120) Ex1     | <i>KLF4</i>   | 60,760       | 36,530                        | 24,230                         | 60.12                                   |
| HF (TIG120) Ex1     | <i>LHX1</i>   | 52,588       | 17,831                        | 34,757                         | 33.9                                    |

|                 |                     |         |        |        |       |
|-----------------|---------------------|---------|--------|--------|-------|
| HF (TIG120) Ex1 | <i>MESP1</i>        | 102,836 | 47,150 | 55,686 | 45.84 |
| HF (TIG120) Ex1 | <i>MIXL1</i>        | 101,297 | 60,310 | 40,987 | 59.53 |
| HF (TIG120) Ex1 | <i>NANOG</i>        | 54,268  | 13,266 | 41,002 | 24.44 |
| HF (TIG120) Ex1 | <i>NANOG_P</i>      | 62,101  | 25,034 | 37,067 | 40.31 |
| HF (TIG120) Ex1 | <i>NEUROD1</i>      | 95,002  | 61,605 | 33,397 | 64.84 |
| HF (TIG120) Ex1 | <i>NEUROD4</i>      | 95,678  | 36,426 | 59,252 | 38.07 |
| HF (TIG120) Ex1 | <i>NEUROG2</i>      | 108,223 | 66,922 | 41,301 | 61.83 |
| HF (TIG120) Ex1 | <i>NKX2-5</i>       | 111,321 | 60,778 | 50,543 | 54.59 |
| HF (TIG120) Ex1 | <i>NR2F2</i>        | 78,617  | 39,609 | 39,008 | 50.38 |
| HF (TIG120) Ex1 | <i>PAX3</i>         | 11,540  | 6,793  | 4,747  | 58.86 |
| HF (TIG120) Ex1 | <i>PAX6</i>         | 98,726  | 41,747 | 56,979 | 42.28 |
| HF (TIG120) Ex1 | <i>POU5F1</i>       | 77,322  | 35,467 | 41,855 | 45.86 |
| HF (TIG120) Ex1 | <i>Intergenic 1</i> | 116,693 | 57,241 | 59,452 | 49.05 |
| HF (TIG120) Ex1 | <i>Intergenic 2</i> | 133,599 | 58,572 | 75,027 | 43.84 |
| HF (TIG120) Ex1 | <i>Intergenic 3</i> | 68,691  | 39,033 | 29,658 | 56.82 |
| HF (TIG120) Ex1 | <i>Intergenic 4</i> | 118,176 | 47,711 | 70,465 | 40.37 |
| HF (TIG120) Ex1 | <i>Intergenic 5</i> | 103,027 | 62,314 | 40,713 | 60.48 |
| HF (TIG120) Ex1 | <i>SNAI1</i>        | 138,122 | 57,287 | 80,835 | 41.47 |
| HF (TIG120) Ex1 | <i>SOX1</i>         | 88,539  | 35,452 | 53,087 | 40.04 |
| HF (TIG120) Ex1 | <i>SOX17</i>        | 70,184  | 30,473 | 39,711 | 43.41 |
| HF (TIG120) Ex1 | <i>SOX2</i>         | 119,294 | 75,014 | 44,280 | 62.88 |
| HF (TIG120) Ex1 | <i>SOX7</i>         | 52,695  | 22,037 | 30,658 | 41.81 |

|                 |               |         |        |        |       |
|-----------------|---------------|---------|--------|--------|-------|
| HF (TIG120) Ex1 | <i>SST</i>    | 100,199 | 51,482 | 48,717 | 51.37 |
| HF (TIG120) Ex1 | <i>T</i>      | 57,231  | 33,005 | 24,226 | 57.66 |
| HF (TIG120) Ex1 | <i>TBX6</i>   | 62,192  | 26,472 | 35,720 | 42.56 |
| HF (TIG120) Ex1 | <i>TCF21</i>  | 103,835 | 60,775 | 43,060 | 58.53 |
| HF (TIG120) Ex1 | <i>TWIST1</i> | 83,126  | 49,586 | 33,540 | 59.65 |
| HF (TIG120) Ex1 | <i>ZIC1</i>   | 19,021  | 12,216 | 6,805  | 64.22 |
| HF (TIG120) Ex2 | <i>ASCL1</i>  | 82,224  | 15,822 | 66,402 | 19.24 |
| HF (TIG120) Ex2 | <i>ASCL2</i>  | 107,126 | 41,415 | 65,711 | 38.66 |
| HF (TIG120) Ex2 | <i>COL2A1</i> | 133,985 | 60,131 | 73,854 | 44.87 |
| HF (TIG120) Ex2 | <i>DPPA4</i>  | 109,917 | 46,250 | 63,667 | 42.07 |
| HF (TIG120) Ex2 | <i>EOMES</i>  | 125,220 | 60,571 | 64,649 | 48.37 |
| HF (TIG120) Ex2 | <i>ERCC3</i>  | 24,118  | 10,195 | 13,923 | 42.27 |
| HF (TIG120) Ex2 | <i>ETS2</i>   | 15,038  | 5,817  | 9,221  | 38.68 |
| HF (TIG120) Ex2 | <i>EVX1</i>   | 31,067  | 15,647 | 15,420 | 50.36 |
| HF (TIG120) Ex2 | <i>FOXA2</i>  | 48,671  | 12,218 | 36,453 | 25.1  |
| HF (TIG120) Ex2 | <i>FOXF1</i>  | 58,202  | 21,629 | 36,573 | 37.16 |
| HF (TIG120) Ex2 | <i>GAPDH</i>  | 117,042 | 46,499 | 70,543 | 39.72 |
| HF (TIG120) Ex2 | <i>GATA4</i>  | 97,462  | 39,476 | 57,986 | 40.5  |
| HF (TIG120) Ex2 | <i>GATA5</i>  | 139,980 | 50,612 | 89,368 | 36.15 |
| HF (TIG120) Ex2 | <i>GATA6</i>  | 67,749  | 28,891 | 38,858 | 42.64 |
| HF (TIG120) Ex2 | <i>GSC</i>    | 105,208 | 39,165 | 66,043 | 37.22 |
| HF (TIG120) Ex2 | <i>HNF4A</i>  | 70,324  | 25,088 | 45,236 | 35.67 |

|                 |                     |         |        |        |       |
|-----------------|---------------------|---------|--------|--------|-------|
| HF (TIG120) Ex2 | <i>HOXA13</i>       | 138,380 | 80,838 | 57,542 | 58.41 |
| HF (TIG120) Ex2 | <i>KLF4</i>         | 73,813  | 43,609 | 30,204 | 59.08 |
| HF (TIG120) Ex2 | <i>LHX1</i>         | 69,153  | 21,601 | 47,552 | 31.23 |
| HF (TIG120) Ex2 | <i>MESP1</i>        | 126,342 | 54,577 | 71,765 | 43.19 |
| HF (TIG120) Ex2 | <i>MIXL1</i>        | 124,107 | 70,357 | 53,750 | 56.69 |
| HF (TIG120) Ex2 | <i>NANOG</i>        | 74,062  | 13,463 | 60,599 | 18.17 |
| HF (TIG120) Ex2 | <i>NANOG_P</i>      | 79,948  | 29,640 | 50,308 | 37.07 |
| HF (TIG120) Ex2 | <i>NEUROD1</i>      | 125,779 | 77,253 | 48,526 | 61.41 |
| HF (TIG120) Ex2 | <i>NEUROD4</i>      | 118,535 | 33,725 | 84,810 | 28.45 |
| HF (TIG120) Ex2 | <i>NEUROG2</i>      | 130,948 | 76,209 | 54,739 | 58.19 |
| HF (TIG120) Ex2 | <i>NKX2-5</i>       | 139,924 | 75,401 | 64,523 | 53.88 |
| HF (TIG120) Ex2 | <i>NR2F2</i>        | 95,135  | 43,522 | 51,613 | 45.74 |
| HF (TIG120) Ex2 | <i>PAX3</i>         | 15,056  | 7,939  | 7,117  | 52.72 |
| HF (TIG120) Ex2 | <i>PAX6</i>         | 118,493 | 45,019 | 73,474 | 37.99 |
| HF (TIG120) Ex2 | <i>POU5F1</i>       | 100,909 | 43,696 | 57,213 | 43.3  |
| HF (TIG120) Ex2 | <i>Intergenic 1</i> | 138,159 | 60,915 | 77,244 | 44.09 |
| HF (TIG120) Ex2 | <i>Intergenic 2</i> | 155,346 | 64,347 | 90,999 | 41.42 |
| HF (TIG120) Ex2 | <i>Intergenic 3</i> | 94,557  | 51,036 | 43,521 | 53.97 |
| HF (TIG120) Ex2 | <i>Intergenic 4</i> | 140,116 | 53,643 | 86,473 | 38.28 |
| HF (TIG120) Ex2 | <i>Intergenic 5</i> | 142,623 | 74,712 | 67,911 | 52.38 |
| HF (TIG120) Ex2 | <i>SNAI1</i>        | 165,002 | 65,686 | 99,316 | 39.8  |
| HF (TIG120) Ex2 | <i>SOX1</i>         | 114,099 | 39,653 | 74,446 | 34.75 |

|                 |               |         |        |        |       |
|-----------------|---------------|---------|--------|--------|-------|
| HF (TIG120) Ex2 | <i>SOX17</i>  | 82,173  | 30,552 | 51,621 | 37.18 |
| HF (TIG120) Ex2 | <i>SOX2</i>   | 140,691 | 81,691 | 59,000 | 58.06 |
| HF (TIG120) Ex2 | <i>SOX7</i>   | 68,733  | 25,481 | 43,252 | 37.07 |
| HF (TIG120) Ex2 | <i>SST</i>    | 123,654 | 60,295 | 63,359 | 48.76 |
| HF (TIG120) Ex2 | <i>T</i>      | 84,409  | 42,883 | 41,526 | 50.8  |
| HF (TIG120) Ex2 | <i>TBX6</i>   | 84,201  | 34,331 | 49,870 | 40.77 |
| HF (TIG120) Ex2 | <i>TCF21</i>  | 117,519 | 64,599 | 52,920 | 54.96 |
| HF (TIG120) Ex2 | <i>TWIST1</i> | 98,707  | 52,871 | 45,836 | 53.56 |
| HF (TIG120) Ex2 | <i>ZIC1</i>   | 23,504  | 14,102 | 9,402  | 59.99 |
| iPS (428C2) Ex1 | <i>ASCL1</i>  | 45,094  | 19,145 | 25,949 | 42.45 |
| iPS (428C2) Ex1 | <i>ASCL2</i>  | 82,295  | 42,289 | 40,006 | 51.38 |
| iPS (428C2) Ex1 | <i>COL2A1</i> | 132,281 | 56,345 | 75,936 | 42.59 |
| iPS (428C2) Ex1 | <i>DPPA4</i>  | 121,818 | 67,399 | 54,419 | 55.32 |
| iPS (428C2) Ex1 | <i>EOMES</i>  | 87,522  | 55,898 | 31,624 | 63.86 |
| iPS (428C2) Ex1 | <i>ERCC3</i>  | 23,610  | 11,677 | 11,933 | 49.45 |
| iPS (428C2) Ex1 | <i>ETS2</i>   | 10,593  | 4,416  | 6,177  | 41.68 |
| iPS (428C2) Ex1 | <i>EVX1</i>   | 24,397  | 16,582 | 7,815  | 67.96 |
| iPS (428C2) Ex1 | <i>FOXA2</i>  | 34,950  | 22,563 | 12,387 | 64.55 |
| iPS (428C2) Ex1 | <i>FOXF1</i>  | 43,000  | 25,370 | 17,630 | 59    |
| iPS (428C2) Ex1 | <i>GAPDH</i>  | 95,259  | 49,175 | 46,084 | 51.62 |
| iPS (428C2) Ex1 | <i>GATA4</i>  | 90,624  | 48,150 | 42,474 | 53.13 |
| iPS (428C2) Ex1 | <i>GATA5</i>  | 128,025 | 57,110 | 70,915 | 44.6  |

|                 |                     |         |        |        |       |
|-----------------|---------------------|---------|--------|--------|-------|
| iPS (428C2) Ex1 | <i>GATA6</i>        | 56,870  | 29,053 | 27,817 | 51.08 |
| iPS (428C2) Ex1 | <i>GSC</i>          | 87,829  | 44,763 | 43,066 | 50.96 |
| iPS (428C2) Ex1 | <i>HNF4A</i>        | 70,006  | 27,918 | 42,088 | 39.87 |
| iPS (428C2) Ex1 | <i>HOXA13</i>       | 118,612 | 69,823 | 48,789 | 58.86 |
| iPS (428C2) Ex1 | <i>KLF4</i>         | 61,545  | 33,040 | 28,505 | 53.68 |
| iPS (428C2) Ex1 | <i>LHX1</i>         | 56,708  | 32,001 | 24,707 | 56.43 |
| iPS (428C2) Ex1 | <i>MESP1</i>        | 118,534 | 56,557 | 61,977 | 65.9  |
| iPS (428C2) Ex1 | <i>MIXL1</i>        | 130,956 | 63,743 | 67,213 | 48.67 |
| iPS (428C2) Ex1 | <i>NANOG</i>        | 66,375  | 21,624 | 44,751 | 32.57 |
| iPS (428C2) Ex1 | <i>NANOG_P</i>      | 80,563  | 33,193 | 47,370 | 41.2  |
| iPS (428C2) Ex1 | <i>NEUROD1</i>      | 116,423 | 76,291 | 40,132 | 65.52 |
| iPS (428C2) Ex1 | <i>NEUROD4</i>      | 108,876 | 40,615 | 68,261 | 37.3  |
| iPS (428C2) Ex1 | <i>NEUROG2</i>      | 135,078 | 74,376 | 60,702 | 55.06 |
| iPS (428C2) Ex1 | <i>NKX2-5</i>       | 127,837 | 70,136 | 57,701 | 54.86 |
| iPS (428C2) Ex1 | <i>NR2F2</i>        | 76,871  | 50,125 | 26,746 | 65.2  |
| iPS (428C2) Ex1 | <i>PAX3</i>         | 11,943  | 8,717  | 3,226  | 72.98 |
| iPS (428C2) Ex1 | <i>PAX6</i>         | 120,853 | 73,113 | 47,740 | 60.49 |
| iPS (428C2) Ex1 | <i>POU5F1</i>       | 95,638  | 49,204 | 46,434 | 51.44 |
| iPS (428C2) Ex1 | <i>Intergenic 1</i> | 112,557 | 55,552 | 57,005 | 49.35 |
| iPS (428C2) Ex1 | <i>Intergenic 2</i> | 152,879 | 72,387 | 80,492 | 47.34 |
| iPS (428C2) Ex1 | <i>Intergenic 3</i> | 84,578  | 43,773 | 40,805 | 51.75 |
| iPS (428C2) Ex1 | <i>Intergenic 4</i> | 141,812 | 56,282 | 85,530 | 39.68 |

|                 |                     |         |        |         |       |
|-----------------|---------------------|---------|--------|---------|-------|
| iPS (428C2) Ex1 | <i>Intergenic 5</i> | 138,607 | 78,244 | 60,363  | 56.45 |
| iPS (428C2) Ex1 | <i>SNAI1</i>        | 152,650 | 64,250 | 88,400  | 42.08 |
| iPS (428C2) Ex1 | <i>SOX1</i>         | 101,881 | 57,825 | 44,056  | 56.75 |
| iPS (428C2) Ex1 | <i>SOX17</i>        | 79,908  | 45,537 | 34,371  | 56.98 |
| iPS (428C2) Ex1 | <i>SOX2</i>         | 150,493 | 83,193 | 67,300  | 55.28 |
| iPS (428C2) Ex1 | <i>SOX7</i>         | 64,348  | 36,661 | 27,687  | 56.97 |
| iPS (428C2) Ex1 | <i>SST</i>          | 113,824 | 49,666 | 64,158  | 43.63 |
| iPS (428C2) Ex1 | <i>T</i>            | 75,427  | 46,195 | 29,232  | 61.24 |
| iPS (428C2) Ex1 | <i>TBX6</i>         | 82,975  | 33,808 | 49,167  | 40.74 |
| iPS (428C2) Ex1 | <i>TCF21</i>        | 111,689 | 53,136 | 58,553  | 47.57 |
| iPS (428C2) Ex1 | <i>TWIST1</i>       | 83,407  | 47,885 | 35,522  | 57.41 |
| iPS (428C2) Ex1 | <i>ZIC1</i>         | 20,026  | 14,765 | 5,261   | 73.72 |
| iPS (428C2) Ex1 | <i>LIN28B</i>       | 66,071  | 33,101 | 32,970  | 50.1  |
| iPS (428C2) Ex1 | <i>YTHDF2</i>       | 72,845  | 31,804 | 41,041  | 43.66 |
| iPS (428C2) Ex1 | <i>YBX1</i>         | 77,529  | 33,271 | 44,258  | 42.91 |
| iPS (428C2) Ex1 | <i>ZZZ3</i>         | 83,648  | 39,909 | 43,739  | 47.71 |
| iPS (428C2) Ex1 | <i>MYCN</i>         | 74,581  | 45,848 | 28,733  | 61.47 |
| iPS (428C2) Ex1 | <i>MITD1</i>        | 149,571 | 42,052 | 107,519 | 28.12 |
| iPS (428C2) Ex1 | <i>DPH3</i>         | 98,359  | 39,184 | 59,175  | 39.84 |
| iPS (428C2) Ex1 | <i>ZFP42</i>        | 77,834  | 38,925 | 38,909  | 50.01 |
| iPS (428C2) Ex1 | <i>KIF2A</i>        | 65,966  | 30,205 | 35,761  | 45.79 |
| iPS (428C2) Ex1 | <i>PTPRZ1</i>       | 58,344  | 25,360 | 32,984  | 43.47 |



|                 |                 |         |        |        |       |
|-----------------|-----------------|---------|--------|--------|-------|
| iPS (428C2) Ex1 | <i>PODXL</i>    | 76,763  | 34,575 | 42,188 | 45.04 |
| iPS (428C2) Ex1 | <i>TAF2</i>     | 36,778  | 11,997 | 24,781 | 32.62 |
| iPS (428C2) Ex1 | <i>FGFR2</i>    | 83,530  | 36,880 | 46,650 | 44.15 |
| iPS (428C2) Ex1 | <i>STX5</i>     | 68,165  | 31,055 | 37,110 | 45.56 |
| iPS (428C2) Ex1 | <i>BCAT1</i>    | 66,583  | 25,945 | 40,638 | 38.97 |
| iPS (428C2) Ex1 | <i>METAP2</i>   | 52,783  | 23,129 | 29,654 | 43.82 |
| iPS (428C2) Ex1 | <i>KDM2B</i>    | 100,621 | 39,815 | 60,806 | 39.57 |
| iPS (428C2) Ex1 | <i>NCL</i>      | 83,869  | 36,845 | 47,024 | 43.93 |
| iPS (428C2) Ex1 | <i>LIG1</i>     | 71,571  | 25,456 | 46,115 | 35.57 |
| iPS (428C2) Ex1 | <i>DNMT3B</i>   | 28,984  | 12,246 | 16,738 | 42.25 |
| iPS (428C2) Ex1 | <i>SALL4</i>    | 108,411 | 40,444 | 67,967 | 37.31 |
| iPS (428C2) Ex1 | <i>ACO2</i>     | 63,538  | 18,184 | 45,354 | 28.62 |
| iPS (428C2) Ex1 | <i>ARHGEF38</i> | 58,397  | 19,816 | 38,581 | 33.93 |
| iPS (428C2) Ex1 | <i>SLC34A1</i>  | 91,916  | 37,517 | 54,399 | 40.82 |
| iPS (428C2) Ex1 | <i>GIMAP1</i>   | 61,182  | 21,548 | 39,634 | 35.22 |
| iPS (428C2) Ex1 | <i>PRSS3</i>    | 55,328  | 14,991 | 40,337 | 27.09 |
| iPS (428C2) Ex1 | <i>HEMGN</i>    | 76,067  | 23,365 | 52,702 | 30.72 |
| iPS (428C2) Ex1 | <i>TNFSF8</i>   | 57,870  | 17,256 | 40,614 | 29.82 |
| iPS (428C2) Ex1 | <i>OBP2B</i>    | 59,080  | 17,553 | 41,527 | 29.71 |
| iPS (428C2) Ex1 | <i>ANKRD1</i>   | 55,763  | 23,200 | 32,563 | 41.6  |
| iPS (428C2) Ex1 | <i>SOX6</i>     | 71,550  | 28,635 | 42,915 | 40.02 |
| iPS (428C2) Ex1 | <i>FLRT1</i>    | 78,681  | 27,604 | 51,077 | 35.08 |

|                 |                  |         |        |        |       |
|-----------------|------------------|---------|--------|--------|-------|
| iPS (428C2) Ex1 | <i>KRTAP5-11</i> | 41,672  | 16,562 | 25,110 | 39.74 |
| iPS (428C2) Ex1 | <i>GAST</i>      | 73,433  | 25,528 | 47,905 | 34.76 |
| iPS (428C2) Ex1 | <i>DEFB132</i>   | 23,044  | 6,746  | 16,298 | 29.27 |
| iPS (428C2) Ex1 | <i>MC3R</i>      | 40,778  | 18,915 | 21,863 | 46.39 |
| iPS (428C2) Ex1 | <i>VPREB1</i>    | 51,228  | 14,107 | 37,121 | 27.54 |
| iPS (428C2) Ex1 | <i>PRAME</i>     | 68,137  | 28,204 | 39,933 | 41.39 |
| iPS (428C2) Ex1 | <i>IGLL5</i>     | 60,384  | 17,559 | 42,825 | 29.08 |
| iPS (428C2) Ex1 | <i>COLQ</i>      | 82,191  | 32,388 | 49,803 | 39.41 |
| iPS (428C2) Ex1 | <i>CBLN2</i>     | 69,218  | 21,902 | 47,316 | 31.64 |
| iPS (428C2) Ex1 | <i>TREM1</i>     | 84,098  | 29,132 | 54,966 | 34.64 |
| iPS (428C2) Ex2 | <i>ASCL1</i>     | 47,912  | 19,652 | 28,260 | 41.01 |
| iPS (428C2) Ex2 | <i>ASCL2</i>     | 91,976  | 48,086 | 43,890 | 52.28 |
| iPS (428C2) Ex2 | <i>COL2A1</i>    | 137,159 | 60,532 | 76,627 | 44.13 |
| iPS (428C2) Ex2 | <i>DPPA4</i>     | 124,363 | 70,147 | 54,216 | 56.4  |
| iPS (428C2) Ex2 | <i>EOMES</i>     | 92,101  | 60,151 | 31,950 | 65.3  |
| iPS (428C2) Ex2 | <i>ERCC3</i>     | 21,381  | 10,570 | 10,811 | 49.43 |
| iPS (428C2) Ex2 | <i>ETS2</i>      | 14,890  | 6,192  | 8,698  | 41.58 |
| iPS (428C2) Ex2 | <i>EVX1</i>      | 32,730  | 22,195 | 10,535 | 67.81 |
| iPS (428C2) Ex2 | <i>FOXA2</i>     | 47,011  | 30,154 | 16,857 | 64.14 |
| iPS (428C2) Ex2 | <i>FOXF1</i>     | 51,545  | 30,920 | 20,625 | 59.98 |
| iPS (428C2) Ex2 | <i>GAPDH</i>     | 97,766  | 50,686 | 47,080 | 51.84 |
| iPS (428C2) Ex2 | <i>GATA4</i>     | 98,001  | 52,853 | 45,148 | 53.93 |

|                 |                     |         |        |        |       |
|-----------------|---------------------|---------|--------|--------|-------|
| iPS (428C2) Ex2 | <i>GATA5</i>        | 134,326 | 60,140 | 74,186 | 44.77 |
| iPS (428C2) Ex2 | <i>GATA6</i>        | 63,153  | 32,736 | 30,417 | 51.83 |
| iPS (428C2) Ex2 | <i>GSC</i>          | 98,677  | 51,560 | 47,117 | 52.25 |
| iPS (428C2) Ex2 | <i>HNF4A</i>        | 68,356  | 28,545 | 39,811 | 41.75 |
| iPS (428C2) Ex2 | <i>HOXA13</i>       | 121,511 | 74,091 | 47,420 | 60.97 |
| iPS (428C2) Ex2 | <i>KLF4</i>         | 65,041  | 37,268 | 27,773 | 57.29 |
| iPS (428C2) Ex2 | <i>LHX1</i>         | 71,414  | 40,893 | 30,521 | 57.26 |
| iPS (428C2) Ex2 | <i>MESP1</i>        | 116,665 | 57,072 | 59,593 | 48.91 |
| iPS (428C2) Ex2 | <i>MIXL1</i>        | 133,655 | 66,233 | 67,422 | 49.55 |
| iPS (428C2) Ex2 | <i>NANOG</i>        | 68,933  | 22,821 | 46,112 | 33.1  |
| iPS (428C2) Ex2 | <i>NANOG_P</i>      | 86,404  | 36,936 | 49,468 | 42.74 |
| iPS (428C2) Ex2 | <i>NEUROD1</i>      | 120,813 | 81,222 | 39,591 | 67.22 |
| iPS (428C2) Ex2 | <i>NEUROD4</i>      | 118,352 | 45,719 | 72,633 | 38.62 |
| iPS (428C2) Ex2 | <i>NEUROG2</i>      | 137,897 | 79,297 | 58,600 | 57.5  |
| iPS (428C2) Ex2 | <i>NKX2-5</i>       | 131,584 | 75,155 | 56,429 | 57.11 |
| iPS (428C2) Ex2 | <i>NR2F2</i>        | 76,561  | 50,775 | 25,786 | 66.31 |
| iPS (428C2) Ex2 | <i>PAX3</i>         | 15,562  | 11,474 | 4,088  | 73.73 |
| iPS (428C2) Ex2 | <i>PAX6</i>         | 116,248 | 72,319 | 43,929 | 62.21 |
| iPS (428C2) Ex2 | <i>POU5F1</i>       | 99,819  | 51,972 | 47,847 | 52.06 |
| iPS (428C2) Ex2 | <i>Intergenic 1</i> | 123,363 | 60,707 | 62,656 | 49.21 |
| iPS (428C2) Ex2 | <i>Intergenic 2</i> | 157,121 | 74,664 | 82,457 | 47.52 |
| iPS (428C2) Ex2 | <i>Intergenic 3</i> | 99,219  | 52,999 | 46,220 | 53.41 |

|                 |                     |         |        |         |       |
|-----------------|---------------------|---------|--------|---------|-------|
| iPS (428C2) Ex2 | <i>Intergenic 4</i> | 146,250 | 59,813 | 86,437  | 40.89 |
| iPS (428C2) Ex2 | <i>Intergenic 5</i> | 138,746 | 83,063 | 55,683  | 59.86 |
| iPS (428C2) Ex2 | <i>SNAI1</i>        | 153,933 | 66,731 | 87,202  | 43.35 |
| iPS (428C2) Ex2 | <i>SOX1</i>         | 108,434 | 61,865 | 46,569  | 57.05 |
| iPS (428C2) Ex2 | <i>SOX17</i>        | 82,396  | 47,336 | 35,060  | 57.44 |
| iPS (428C2) Ex2 | <i>SOX2</i>         | 152,306 | 89,643 | 62,663  | 58.85 |
| iPS (428C2) Ex2 | <i>SOX7</i>         | 65,557  | 38,631 | 26,926  | 58.92 |
| iPS (428C2) Ex2 | <i>SST</i>          | 120,878 | 55,083 | 65,795  | 45.56 |
| iPS (428C2) Ex2 | <i>T</i>            | 89,024  | 54,986 | 34,038  | 61.76 |
| iPS (428C2) Ex2 | <i>TBX6</i>         | 88,009  | 36,691 | 51,318  | 41.69 |
| iPS (428C2) Ex2 | <i>TCF21</i>        | 115,275 | 58,448 | 56,827  | 50.7  |
| iPS (428C2) Ex2 | <i>TWIST1</i>       | 90,456  | 53,133 | 37,323  | 58.73 |
| iPS (428C2) Ex2 | <i>ZIC1</i>         | 20,933  | 15,517 | 5,416   | 74.12 |
| iPS (428C2) Ex2 | <i>LIN28B</i>       | 71,346  | 37,876 | 33,470  | 53.09 |
| iPS (428C2) Ex2 | <i>YTHDF2</i>       | 70,016  | 33,842 | 36,174  | 48.33 |
| iPS (428C2) Ex2 | <i>YBX1</i>         | 76,329  | 36,734 | 39,595  | 48.13 |
| iPS (428C2) Ex2 | <i>ZZZ3</i>         | 78,247  | 43,987 | 34,260  | 56.22 |
| iPS (428C2) Ex2 | <i>MYCN</i>         | 69,613  | 47,414 | 22,199  | 68.11 |
| iPS (428C2) Ex2 | <i>MITD1</i>        | 146,771 | 44,281 | 102,490 | 30.17 |
| iPS (428C2) Ex2 | <i>DPH3</i>         | 90,811  | 42,653 | 48,158  | 46.97 |
| iPS (428C2) Ex2 | <i>ZFP42</i>        | 74,635  | 40,607 | 34,028  | 54.41 |
| iPS (428C2) Ex2 | <i>KIF2A</i>        | 60,293  | 31,873 | 28,420  | 52.86 |

|                 |                 |         |        |        |       |
|-----------------|-----------------|---------|--------|--------|-------|
| iPS (428C2) Ex2 | <i>PTPRZ1</i>   | 57,857  | 28,638 | 29,219 | 49.5  |
| iPS (428C2) Ex2 | <i>PODXL</i>    | 75,730  | 38,192 | 37,538 | 50.43 |
| iPS (428C2) Ex2 | <i>TAF2</i>     | 38,405  | 13,677 | 24,728 | 35.61 |
| iPS (428C2) Ex2 | <i>FGFR2</i>    | 80,903  | 40,212 | 40,691 | 49.7  |
| iPS (428C2) Ex2 | <i>STX5</i>     | 61,883  | 30,772 | 31,111 | 49.73 |
| iPS (428C2) Ex2 | <i>BCAT1</i>    | 69,618  | 30,155 | 39,463 | 43.31 |
| iPS (428C2) Ex2 | <i>METAP2</i>   | 55,398  | 26,630 | 28,768 | 48.07 |
| iPS (428C2) Ex2 | <i>KDM2B</i>    | 92,430  | 41,694 | 50,736 | 45.11 |
| iPS (428C2) Ex2 | <i>NCL</i>      | 82,648  | 40,438 | 42,210 | 48.93 |
| iPS (428C2) Ex2 | <i>LIG1</i>     | 64,533  | 26,555 | 37,978 | 41.15 |
| iPS (428C2) Ex2 | <i>DNMT3B</i>   | 30,117  | 13,944 | 16,173 | 46.3  |
| iPS (428C2) Ex2 | <i>SALL4</i>    | 101,945 | 43,558 | 58,387 | 42.73 |
| iPS (428C2) Ex2 | <i>ACO2</i>     | 71,622  | 23,141 | 48,481 | 32.31 |
| iPS (428C2) Ex2 | <i>ARHGEF38</i> | 60,052  | 23,183 | 36,869 | 38.6  |
| iPS (428C2) Ex2 | <i>SLC34A1</i>  | 84,084  | 38,849 | 45,235 | 46.2  |
| iPS (428C2) Ex2 | <i>GIMAP1</i>   | 58,248  | 23,395 | 34,853 | 40.16 |
| iPS (428C2) Ex2 | <i>PRSS3</i>    | 57,922  | 17,955 | 39,967 | 31    |
| iPS (428C2) Ex2 | <i>HEMGN</i>    | 73,427  | 25,779 | 47,648 | 35.11 |
| iPS (428C2) Ex2 | <i>TNFSF8</i>   | 58,816  | 19,456 | 39,360 | 33.08 |
| iPS (428C2) Ex2 | <i>OBP2B</i>    | 55,935  | 18,529 | 37,406 | 33.13 |
| iPS (428C2) Ex2 | <i>ANKRD1</i>   | 54,425  | 25,859 | 28,566 | 47.51 |
| iPS (428C2) Ex2 | <i>SOX6</i>     | 69,297  | 31,123 | 38,174 | 44.91 |

|                 |     |                  |        |        |        |       |
|-----------------|-----|------------------|--------|--------|--------|-------|
| iPS (428C2) Ex2 |     | <i>FLRT1</i>     | 76,582 | 30,642 | 45,940 | 40.01 |
| iPS (428C2) Ex2 |     | <i>KRTAP5-11</i> | 39,188 | 18,219 | 20,969 | 46.49 |
| iPS (428C2) Ex2 |     | <i>GAST</i>      | 69,903 | 28,238 | 41,665 | 40.4  |
| iPS (428C2) Ex2 |     | <i>DEFB132</i>   | 22,265 | 7,231  | 15,034 | 32.48 |
| iPS (428C2) Ex2 |     | <i>MC3R</i>      | 37,751 | 18,779 | 18,972 | 49.74 |
| iPS (428C2) Ex2 |     | <i>VPREB1</i>    | 52,224 | 15,907 | 36,317 | 30.46 |
| iPS (428C2) Ex2 |     | <i>PRAME</i>     | 64,501 | 29,271 | 35,230 | 45.38 |
| iPS (428C2) Ex2 |     | <i>IGLL5</i>     | 59,417 | 19,462 | 39,955 | 32.75 |
| iPS (428C2) Ex2 |     | <i>COLQ</i>      | 83,935 | 37,087 | 46,848 | 44.19 |
| iPS (428C2) Ex2 |     | <i>CBLN2</i>     | 69,744 | 24,769 | 44,975 | 35.51 |
| iPS (428C2) Ex2 |     | <i>TREM1</i>     | 80,927 | 32,120 | 48,807 | 39.69 |
| shNega          |     | <i>TWIST1</i>    | 45746  | 35605  | 10141  | 77.83 |
|                 |     | <i>GSC</i>       | 48901  | 33086  | 15815  | 67.65 |
|                 |     | <i>SOX17</i>     | 43630  | 32580  | 11050  | 74.67 |
|                 |     | <i>NEUROD1</i>   | 63714  | 53015  | 10699  | 83.2  |
|                 |     | <i>NKX2-5</i>    | 68496  | 47009  | 21487  | 68.63 |
|                 |     | <i>NEUROG2</i>   | 75258  | 57589  | 17669  | 76.52 |
|                 |     | <i>PAX6</i>      | 64115  | 48031  | 16084  | 74.91 |
|                 |     | <i>HOXA13</i>    | 62343  | 48299  | 14044  | 77.47 |
| EED             | sh1 | <i>TWIST1</i>    | 29424  | 23117  | 6307   | 78.56 |
|                 |     | <i>GSC</i>       | 37483  | 25618  | 11865  | 68.34 |
|                 |     | <i>SOX17</i>     | 29109  | 21915  | 7194   | 75.28 |

|      |     |                |       |       |       |       |
|------|-----|----------------|-------|-------|-------|-------|
| EED  | sh1 | <i>NEUROD1</i> | 45564 | 39037 | 6527  | 85.67 |
|      |     | <i>NKX2-5</i>  | 57883 | 40506 | 17377 | 69.97 |
|      |     | <i>NEUROG2</i> | 51379 | 40595 | 10784 | 79.01 |
|      |     | <i>PAX6</i>    | 48627 | 37185 | 11442 | 76.46 |
|      |     | <i>HOXA13</i>  | 44361 | 35826 | 8535  | 80.76 |
|      | sh2 | <i>TWIST1</i>  | 40194 | 30600 | 9594  | 76.13 |
|      |     | <i>GSC</i>     | 60946 | 40607 | 20339 | 66.62 |
|      |     | <i>SOX17</i>   | 47189 | 34869 | 12320 | 73.89 |
|      |     | <i>NEUROD1</i> | 68122 | 56816 | 11306 | 83.4  |
|      |     | <i>NKX2-5</i>  | 81175 | 55190 | 25985 | 67.98 |
|      |     | <i>NEUROG2</i> | 84055 | 63688 | 20367 | 75.76 |
|      |     | <i>PAX6</i>    | 66918 | 49681 | 17237 | 74.24 |
|      |     | <i>HOXA13</i>  | 60889 | 47829 | 13060 | 78.55 |
|      |     | <i>TWIST1</i>  | 39295 | 21313 | 17982 | 54.23 |
| WDR5 | sh1 | <i>GSC</i>     | 48731 | 22962 | 25769 | 47.11 |
|      |     | <i>SOX17</i>   | 41628 | 22062 | 19566 | 52.99 |
|      |     | <i>NEUROD1</i> | 56198 | 33838 | 22360 | 60.21 |
|      |     | <i>NKX2-5</i>  | 76918 | 36286 | 40632 | 47.17 |
|      |     | <i>NEUROG2</i> | 73793 | 38646 | 35147 | 52.37 |
|      | sh2 | <i>PAX6</i>    | 62908 | 33237 | 29671 | 52.83 |
|      |     | <i>HOXA13</i>  | 59245 | 31654 | 27591 | 53.42 |
|      |     | <i>TWIST1</i>  | 38274 | 23031 | 15243 | 60.17 |

|             |       |                |       |       |       |       |
|-------------|-------|----------------|-------|-------|-------|-------|
| WDR5        | sh2   | <i>GSC</i>     | 46447 | 24580 | 21867 | 52.92 |
|             |       | <i>SOX17</i>   | 38211 | 22074 | 16137 | 57.76 |
|             |       | <i>NEUROD1</i> | 52315 | 34316 | 17999 | 65.59 |
|             |       | <i>NKX2-5</i>  | 74784 | 39682 | 35102 | 53.06 |
|             |       | <i>NEUROG2</i> | 69504 | 39957 | 29547 | 57.48 |
|             |       | <i>PAX6</i>    | 59040 | 34317 | 24723 | 58.12 |
|             |       | <i>HOXA13</i>  | 56112 | 32918 | 23194 | 58.66 |
| RING1B      | sh1   | <i>TWIST1</i>  | 48326 | 32393 | 15933 | 67.03 |
|             |       | <i>GSC</i>     | 61136 | 35946 | 25190 | 58.79 |
|             |       | <i>SOX17</i>   | 48742 | 31956 | 16786 | 65.56 |
|             |       | <i>NEUROD1</i> | 67511 | 49186 | 18325 | 72.85 |
|             |       | <i>NKX2-5</i>  | 86717 | 50311 | 36406 | 58.01 |
|             |       | <i>NEUROG2</i> | 85229 | 55178 | 30051 | 64.74 |
|             |       | <i>PAX6</i>    | 72365 | 47264 | 25101 | 65.31 |
|             | sh2   | <i>HOXA13</i>  | 67717 | 45080 | 22637 | 66.57 |
|             |       | <i>TWIST1</i>  | 42211 | 31842 | 10369 | 75.43 |
|             |       | <i>GSC</i>     | 50579 | 33173 | 17406 | 65.58 |
|             |       | <i>SOX17</i>   | 42358 | 30985 | 11373 | 73.15 |
|             |       | <i>NEUROD1</i> | 59719 | 48559 | 11160 | 81.31 |
|             |       | <i>NKX2-5</i>  | 74620 | 48949 | 25671 | 65.59 |
|             |       | <i>NEUROG2</i> | 72101 | 53726 | 18375 | 74.51 |
| <i>PAX6</i> | 65279 | 47528          | 17751 | 72.8  |       |       |



*HOXA13*

59442

45014

14428

75.72

---

**Supplementary Table 4. Spearman's correlation coefficients of interaction frequencies (hit%) between biological duplicates or cell types (HDF and iPS)**

| Cis interaction     |                |                |                      |                      |
|---------------------|----------------|----------------|----------------------|----------------------|
| Bait                | iPS (428C2)    | TIG120         | Ex.1 iPS (428C2) vs. | Ex.2 iPS (428C2) vs. |
|                     | Ex.1 vs. Ex. 2 | Ex.1 vs. Ex. 2 | Ex.1 HDF (TIG120)    | Ex.2 HDF (TIG120)    |
| <i>ASCL1</i>        | 0.772569       | 0.808567       | 0.687868             | 0.675739             |
| <i>ASCL2</i>        | 0.908834       | 0.845173       | 0.681867             | 0.714829             |
| <i>DPPA4</i>        | 0.898698       | 0.886055       | 0.522457             | 0.517504             |
| <i>ERCC3</i>        | 0.553455       | 0.665026       | 0.454103             | 0.433568             |
| <i>ETS2</i>         | 0.72659        | 0.876538       | 0.549591             | 0.608938             |
| <i>EVX1</i>         | 0.71608        | 0.753794       | 0.582966             | 0.649208             |
| <i>FOXF1</i>        | 0.796859       | 0.81846        | 0.660651             | 0.685862             |
| <i>GATA6</i>        | 0.891303       | 0.909459       | 0.571612             | 0.559717             |
| <i>HNF4A</i>        | 0.937826       | 0.913496       | 0.851767             | 0.880292             |
| <i>HOXA13</i>       | 0.889001       | 0.919806       | 0.754725             | 0.763992             |
| <i>MIXL1</i>        | 0.899496       | 0.926537       | 0.758836             | 0.772816             |
| <i>NANOG</i>        | 0.720583       | 0.672871       | 0.567468             | 0.544335             |
| <i>NANOG_P</i>      | 0.862057       | 0.865239       | 0.751869             | 0.742993             |
| <i>NEUROD1</i>      | 0.860934       | 0.894531       | 0.821707             | 0.828041             |
| <i>NEUROD4</i>      | 0.747489       | 0.890442       | 0.438555             | 0.478332             |
| <i>POU5F1</i>       | 0.802559       | 0.879102       | 0.715549             | 0.723304             |
| <i>Intergenic 4</i> | 0.941639       | 0.923671       | 0.768317             | 0.773221             |
| <i>Intergenic 5</i> | 0.77461        | 0.827361       | 0.478508             | 0.492985             |
| <i>SOX1</i>         | 0.822855       | 0.93335        | 0.472113             | 0.488847             |
| <i>SOX17</i>        | 0.90174        | 0.794176       | 0.733489             | 0.752261             |
| <i>SOX2</i>         | 0.877147       | 0.908627       | 0.645948             | 0.663819             |
| <i>SOX7</i>         | 0.807695       | 0.746657       | 0.639901             | 0.655964             |
| <i>T</i>            | 0.853468       | 0.876578       | 0.559127             | 0.555226             |
| <i>TCF21</i>        | 0.864998       | 0.907361       | 0.833115             | 0.83703              |
| <i>COL2A1</i>       | 0.866404       | 0.89035        | 0.594865             | 0.579211             |
| <i>EOMES</i>        | 0.743827       | 0.82127        | 0.703268             | 0.713344             |
| <i>FOXA2</i>        | 0.78941        | 0.85149        | 0.529421             | 0.544481             |
| <i>GAPDH</i>        | 0.861951       | 0.914264       | 0.672864             | 0.670391             |
| <i>GATA4</i>        | 0.881109       | 0.771912       | 0.692833             | 0.694226             |
| <i>GATA5</i>        | 0.955289       | 0.954394       | 0.834064             | 0.840987             |

|                     |          |          |          |          |
|---------------------|----------|----------|----------|----------|
| <i>GSC</i>          | 0.923541 | 0.903567 | 0.797043 | 0.806319 |
| <i>KLF4</i>         | 0.885263 | 0.950321 | 0.70905  | 0.725528 |
| <i>LHX1</i>         | 0.904248 | 0.811504 | 0.192042 | 0.203118 |
| <i>MESP1</i>        | 0.945441 | 0.945875 | 0.625648 | 0.626271 |
| <i>NEUROG2</i>      | 0.899891 | 0.936203 | 0.811235 | 0.801021 |
| <i>NKX2-5</i>       | 0.842743 | 0.916825 | 0.749377 | 0.745742 |
| <i>NR2F2</i>        | 0.889598 | 0.901352 | 0.821101 | 0.830427 |
| <i>PAX3</i>         | 0.584575 | 0.646676 | 0.480375 | 0.534003 |
| <i>PAX6</i>         | 0.902329 | 0.86084  | 0.8185   | 0.829571 |
| <i>Intergenic 1</i> | 0.822934 | 0.893322 | 0.708118 | 0.706065 |
| <i>Intergenic 2</i> | 0.863868 | 0.904491 | 0.61683  | 0.623375 |
| <i>Intergenic 3</i> | 0.824658 | 0.874356 | 0.677823 | 0.706988 |
| <i>SNAI1</i>        | 0.957611 | 0.938518 | 0.778115 | 0.769223 |
| <i>SST</i>          | 0.734616 | 0.824002 | 0.653117 | 0.682422 |
| <i>TBX6</i>         | 0.942792 | 0.90883  | 0.689991 | 0.7108   |
| <i>TWIST1</i>       | 0.795683 | 0.814517 | 0.724801 | 0.719319 |
| <i>ZIC1</i>         | 0.694096 | 0.770364 | 0.691923 | 0.691856 |

#### Trans interaction

| Bait           | iPS (428C2)    | TIG120         | Ex.1 iPS (428C2) vs. | Ex.2 iPS (428C2) vs. |
|----------------|----------------|----------------|----------------------|----------------------|
|                | Ex.1 vs. Ex. 2 | Ex.1 vs. Ex. 2 | Ex.1 HDF (TIG120)    | Ex.2 HDF (TIG120)    |
| <i>ASCL1</i>   | 0.007059       | 0.041234       | 0.011536             | 0.013784             |
| <i>ASCL2</i>   | 0.390434       | 0.079882       | 0.121384             | 0.099337             |
| <i>DPPA4</i>   | 0.202582       | 0.101223       | -0.03951             | -0.04287             |
| <i>ERCC3</i>   | 0.020515       | 0.035124       | 0.026441             | 0.006837             |
| <i>ETS2</i>    | 0.031435       | 0.069926       | 0.023408             | 0.039453             |
| <i>EVX1</i>    | 0.073273       | 0.06591        | 0.034059             | 0.054355             |
| <i>FOXF1</i>   | 0.258531       | 0.12493        | 0.125584             | 0.098653             |
| <i>GATA6</i>   | 0.223103       | 0.237493       | 0.150946             | 0.129321             |
| <i>HNF4A</i>   | 0.227909       | 0.093473       | 0.117345             | 0.114042             |
| <i>HOXA13</i>  | 0.220735       | 0.215356       | 0.131671             | 0.121403             |
| <i>MIXL1</i>   | 0.277145       | 0.152828       | 0.145235             | 0.146536             |
| <i>NANOG</i>   | 0.13654        | 0.047784       | 0.015774             | 0.001821             |
| <i>NANOG_P</i> | 0.328964       | 0.157201       | 0.166044             | 0.160985             |
| <i>NEUROD1</i> | 0.081756       | 0.063047       | 0.043118             | 0.045717             |

|                     |          |          |          |          |
|---------------------|----------|----------|----------|----------|
| <i>NEUROD4</i>      | 0.133474 | 0.137904 | 0.010459 | -0.00229 |
| <i>POU5F1</i>       | 0.445565 | 0.205351 | 0.228508 | 0.218927 |
| <i>Intergenic 4</i> | 0.276282 | 0.189079 | 0.169337 | 0.140599 |
| <i>Intergenic 5</i> | 0.108128 | 0.138783 | 0.026856 | 0.019182 |
| <i>SOX1</i>         | 0.456733 | 0.15103  | 0.029726 | 0.022792 |
| <i>SOX17</i>        | 0.159301 | 0.06513  | 0.055337 | 0.032729 |
| <i>SOX2</i>         | 0.150953 | 0.150374 | 0.053317 | 0.059746 |
| <i>SOX7</i>         | 0.257129 | 0.055782 | 0.027246 | 0.017499 |
| <i>T</i>            | 0.21629  | 0.144051 | 0.065275 | 0.058196 |
| <i>TCF21</i>        | 0.066578 | 0.055582 | 0.034211 | 0.053541 |
| <i>COL2A1</i>       | 0.221902 | 0.154545 | 0.132439 | 0.114018 |
| <i>EOMES</i>        | 0.039328 | 0.03132  | 0.010112 | 0.01293  |
| <i>FOXA2</i>        | 0.161573 | 0.055772 | 0.040817 | 0.041478 |
| <i>GAPDH</i>        | 0.392923 | 0.377449 | 0.286904 | 0.27553  |
| <i>GATA4</i>        | 0.371711 | 0.058153 | 0.067052 | 0.043456 |
| <i>GATA5</i>        | 0.486393 | 0.491211 | 0.327071 | 0.346671 |
| <i>GSC</i>          | 0.307858 | 0.089159 | 0.05687  | 0.03378  |
| <i>KLF4</i>         | 0.052661 | 0.247278 | 0.05892  | 0.039981 |
| <i>LHX1</i>         | 0.333818 | 0.061474 | 0.057953 | 0.045542 |
| <i>MESP1</i>        | 0.365542 | 0.372095 | 0.248492 | 0.241829 |
| <i>NEUROG2</i>      | 0.148083 | 0.090609 | 0.071916 | 0.060861 |
| <i>NKX2-5</i>       | 0.435849 | 0.238319 | 0.207023 | 0.218663 |
| <i>NR2F2</i>        | 0.116074 | 0.085382 | 0.070125 | 0.054729 |
| <i>PAX3</i>         | 0.022021 | 0.025368 | 0.01491  | 0.019375 |
| <i>PAX6</i>         | 0.225059 | 0.076548 | 0.0564   | 0.041321 |
| <i>Intergenic 1</i> | 0.165129 | 0.072472 | 0.073151 | 0.07299  |
| <i>Intergenic 2</i> | 0.513089 | 0.344947 | 0.278557 | 0.271427 |
| <i>Intergenic 3</i> | 0.115721 | 0.087777 | 0.072557 | 0.056525 |
| <i>SNAI1</i>        | 0.533467 | 0.594063 | 0.374487 | 0.354629 |
| <i>SST</i>          | 0.083872 | 0.04465  | 0.049581 | 0.051783 |
| <i>TBX6</i>         | 0.359307 | 0.422943 | 0.262079 | 0.263366 |
| <i>TWIST1</i>       | 0.063345 | 0.051169 | 0.022156 | 0.027533 |
| <i>ZIC1</i>         | 0.031034 | 0.01523  | 0.011822 | 0.019244 |
